# Supplementary material for: Construction and characterization of a magnetic nanoparticle-supported Cu complex: a stable and active nanocatalyst for synthesis of heteroaryl-aryl and di-heteroaryl sulfides
Source: Royal Society of Chemistry journal article supplement (doi:10.1039/d3ra07791h), 2024-01-01

## Supplementary Information

### Construction and characterization of magnetic nanoparticles supported Cu complex: A stable and active nanocatalyst for synthesis of heteroaryl-aryl and di-heteroaryl sulfides

Yutong Fang<sup>1</sup>, Songlin Chen<sup>2,3\*</sup>, Li-Yuan Chang<sup>4\*</sup>

<sup>1</sup> Sinopec Research Institute of Petroleum Processing, BeiJin 100089, China.

<sup>2</sup> Department of Basics, Naval University of Engineering, Wuhan 430030, Hubei, China.

<sup>3</sup> School of Resource and Environmental Engineering, Wuhan University of Science and Technology, Wuhan 430070, Hubei, China.

<sup>4</sup> Institute of Chemical and Nanotechnology Research, Shanghai, China.

**Corresponding-Author Mail:** chensonglin0170@163.com and liyuanchang839@gmail.com

#### Abstract

Diaryl and di-heteroaryl sulfides exist in the structure of many drugs and important biological compounds, also these compounds are well-known in medicinal chemistry due to important biological and pharmaceutical activities. Therefore, the development of novel, ecofriendly and efficient catalytic systems for the preparation of diaryl and di-heteroaryl sulfides is a very attractive and important challenge in organic synthesis. In this attractive methodology, we wish to introduce Fe<sub>3</sub>O<sub>4</sub>@AMBA-CuI nanomaterials as a novel and efficient magnetically recoverable catalyst for the preparation of heteroaryl-aryl and di-heteroaryl sulfides with high yields through reaction of heteroaryl halides with aryl or heteroaryl boronic acids and S<sub>8</sub> as sulfur source under ecofriendly conditions. This catalytic system was very efficient and practical for a diverse range of heteroaryl substrates including benzothiazole, benzoxazole, benzimidazole, oxadiazole, benzofuran, imidazo[1,2-a]pyridine, because the desired diaryl and di-heteroaryl sulfides were prepared with high yields. The reusability-experiments revealed that the Fe<sub>3</sub>O<sub>4</sub>@AMBA-CuI nanocatalyst can be magnetically separated and reused at least six runs without significant decrease in its catalytic activity. VSM and ICP-OES analyzes confirmed that despite using the Fe<sub>3</sub>O<sub>4</sub>@AMBA-CuI nanocatalyst 6 times, the magnetic properties and stability of the catalyst were still maintained. Although all the obtained heteroaryl-aryl and di-heteroaryl sulfide products are known and previously reported, but synthesis of this number of heteroaryl-aryl and di-heteroaryl sulfides has never been reported by any methods.

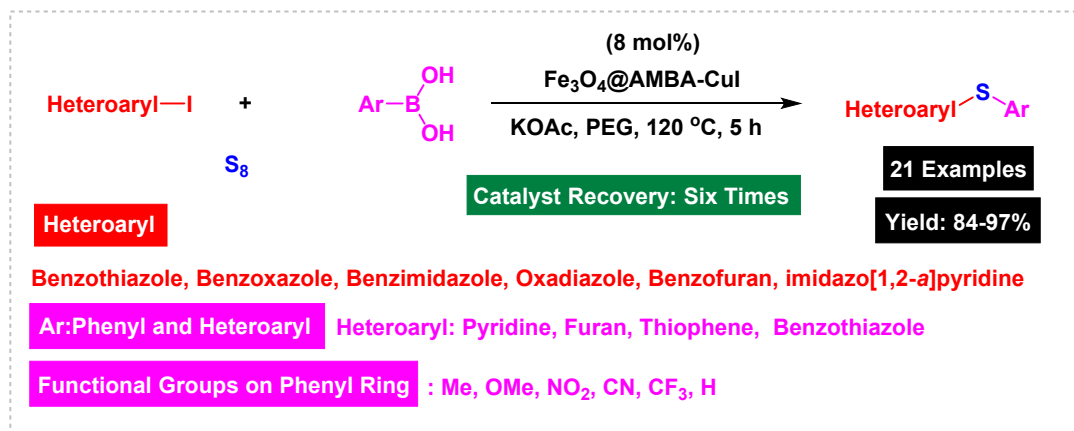

**Keywords:** Diaryl and di-heteroaryl sulfides, Fe<sub>3</sub>O<sub>4</sub>@AMBA-CuI nanocatalyst, Magnetic separation, Pharmaceutical chemistry, Sulfur source.

## Supplementary Information

### Experimental

#### General procedure for preparation of heteroaryl-aryl and di-heteroaryl sulfides catalyzed by Fe<sub>3</sub>O<sub>4</sub>@AMBA-CuI nanocomposite

In a round bottomed flask, a mixture of heteroaryl iodides (0.5 mmol), aryl or heteroaryl boronic acids (0.6 mmol), S<sub>8</sub> (0.5 mmol) KOAc (2 equiv) and Fe<sub>3</sub>O<sub>4</sub>@AMBA-CuI catalyst (8 mol%) was stirred in PEG-400 at 120 °C for 5h (the progress of the reaction was monitored by thin-layer chromatography (TLC)). After completion of the reaction, the Fe<sub>3</sub>O<sub>4</sub>@AMBA-CuI was magnetically separated and reaction mixture was cooled to room temperature and H<sub>2</sub>O (4 mL) was added. The product was extracted with EtOAc (3×4 mL) and dried over anhydrous Na<sub>2</sub>SO<sub>4</sub>. The crude material was purified with chromatography column on silica gel (EtOAc/n-hexane) give the heteroaryl-aryl and di-heteroaryl sulfides products with 84-97%. All heteroaryl-aryl and di-heteroaryl sulfides products are previously reported and known. HNMR and CNMR were used in order to identify the structure of the heteroaryl-aryl and di-heteroaryl sulfide products

Scope of heteroaryl iodides and aryl or heteroaryl boronic acids for synthesis of heteroaryl-aryl and di-heteroaryl sulfides catalyzed by Fe<sub>3</sub>O<sub>4</sub>@AMBA-CuI nanomaterial.

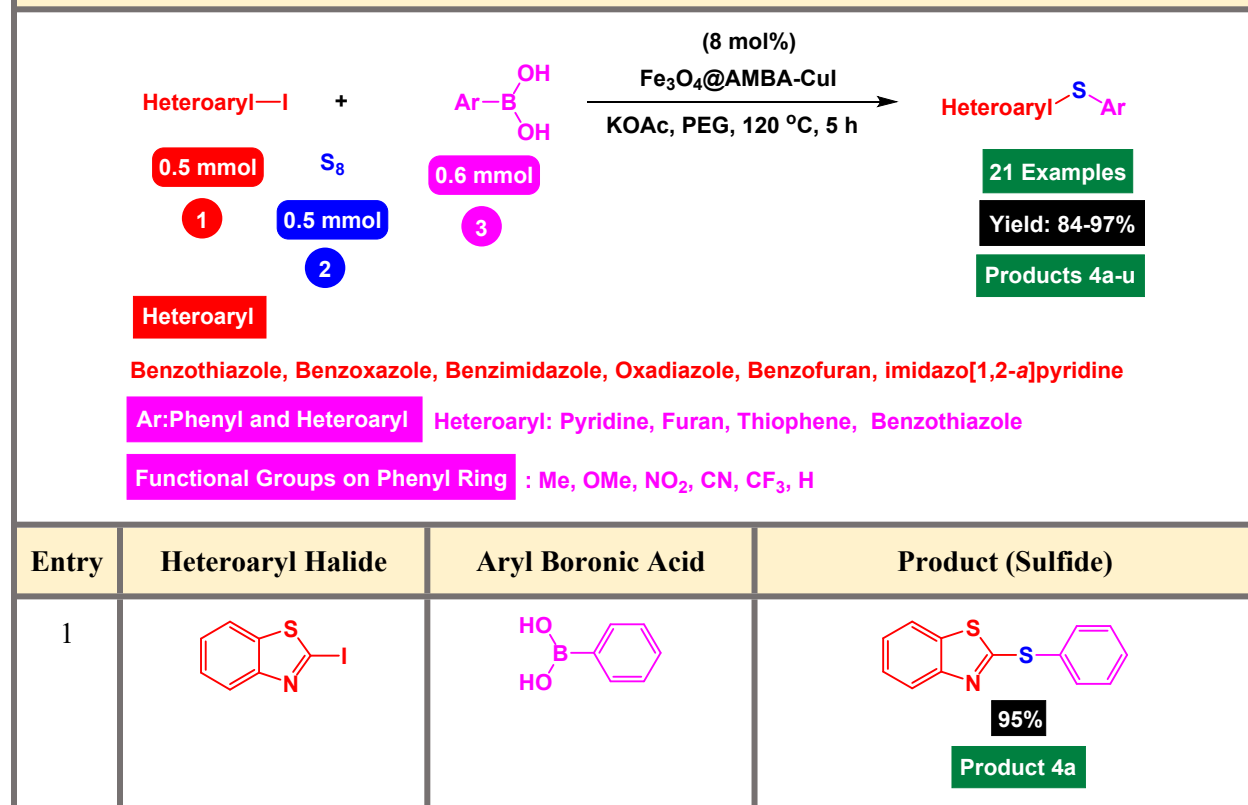

## Supplementary Information

|   |                                                                                     |                                                                                     |                                                                                                                                                                                                                                                                |
|---|-------------------------------------------------------------------------------------|-------------------------------------------------------------------------------------|----------------------------------------------------------------------------------------------------------------------------------------------------------------------------------------------------------------------------------------------------------------|
| 2 | 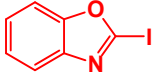   |    | <br><span style="background-color: black; color: white; padding: 2px;">94%</span><br><span style="background-color: green; color: white; padding: 2px;">Product 4b</span>   |
| 3 |    |    | <br><span style="background-color: black; color: white; padding: 2px;">92%</span><br><span style="background-color: green; color: white; padding: 2px;">Product 4c</span>   |
| 4 |    |    | <br><span style="background-color: black; color: white; padding: 2px;">96%</span><br><span style="background-color: green; color: white; padding: 2px;">Product 4d</span>   |
| 5 |    |    | <br><span style="background-color: black; color: white; padding: 2px;">92%</span><br><span style="background-color: green; color: white; padding: 2px;">Product 4e</span>   |
| 6 |  |  | <br><span style="background-color: black; color: white; padding: 2px;">91%</span><br><span style="background-color: green; color: white; padding: 2px;">Product 4f</span> |
| 7 |  |  | <br><span style="background-color: black; color: white; padding: 2px;">97%</span><br><span style="background-color: green; color: white; padding: 2px;">Product 4g</span> |
| 8 |  |  | <br><span style="background-color: black; color: white; padding: 2px;">86%</span><br><span style="background-color: green; color: white; padding: 2px;">Product 4h</span> |

## Supplementary Information

|    |                                                                                     |                                                                                     |                                                                                                                          |
|----|-------------------------------------------------------------------------------------|-------------------------------------------------------------------------------------|--------------------------------------------------------------------------------------------------------------------------|
| 9  | 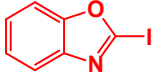   |    | <br><b>96%</b><br><b>Product 4i</b>   |
| 10 |    |    | <br><b>93%</b><br><b>Product 4j</b>   |
| 11 |    |    | <br><b>91%</b><br><b>Product 4k</b>   |
| 12 |    |    | <br><b>85%</b><br><b>Product 4l</b>  |
| 13 |  |  | <br><b>92%</b><br><b>Product 4m</b> |
| 14 |  |  | <br><b>86%</b><br><b>Product 4n</b> |
| 15 |  |  | <br><b>84%</b><br><b>Product 4o</b> |

## Supplementary Information

|    |                                                                                     |                                                                                     |                                                                                                                                                                                          |
|----|-------------------------------------------------------------------------------------|-------------------------------------------------------------------------------------|------------------------------------------------------------------------------------------------------------------------------------------------------------------------------------------|
| 16 | 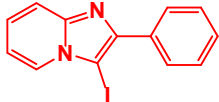   |    |  <p style="text-align: center;"><b>88%</b></p> <p style="text-align: center;"><b>Product 4l</b></p>   |
| 17 |    |    |  <p style="text-align: center;"><b>88%</b></p> <p style="text-align: center;"><b>Product 4q</b></p>   |
| 18 |    |    |  <p style="text-align: center;"><b>90%</b></p> <p style="text-align: center;"><b>Product 4r</b></p>   |
| 19 |  |  |  <p style="text-align: center;"><b>87%</b></p> <p style="text-align: center;"><b>Product 4s</b></p> |
| 20 |  |  |  <p style="text-align: center;"><b>91%</b></p> <p style="text-align: center;"><b>Product 4t</b></p> |
| 21 |  |  |  <p style="text-align: center;"><b>92%</b></p> <p style="text-align: center;"><b>Product 4u</b></p> |

## Supplementary Information

### NMR Data for heteroaryl-aryl and di-heteroaryl sulfide products

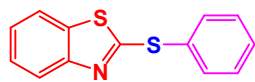

95%

Product 4a

<https://doi.org/10.1002/chem.201600800>

**2-(phenylthio)benzo[d]thiazole:** mp: 32-34 °C,  $^1\text{H}$  NMR (500 MHz,  $\text{CDCl}_3$ )  $\delta$  8.06–8.02 (m, 2H), 7.64–7.60 (m, 2H), 7.58–7.46 (m, 5H);  $^{13}\text{C}$  NMR (126 MHz,  $\text{CDCl}_3$ )  $\delta$  168.8, 155.0, 135.6, 135.1, 130.8, 130.4, 126.7, 124.5, 122.1, 120.7.

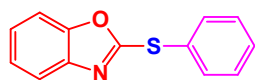

94%

Product 4b

<https://doi.org/10.1021/acs.joc.9b02371>

**2-(phenylthio)benzo[d]oxazole:** Colorless oil,  $^1\text{H}$  NMR (500 MHz,  $\text{CDCl}_3$ )  $\delta$  7.68 – 7.64 (m, 2H), 7.63 – 7.61 (m, 2H), 7.20 – 7.17 (m, 2H), 7.16 – 7.14 (m, 3H);  $^{13}\text{C}$  NMR (126 MHz,  $\text{CDCl}_3$ )  $\delta$  162.8, 152.3, 142.9, 135.1, 130.3, 129.9, 127.2, 124.7, 123.8, 119.4, 110.3.

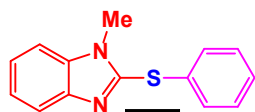

92%

Product 4c

<https://doi.org/10.1016/j.tet.2006.02.071>

**1-methyl-2-(phenylthio)-1H-benzo[d]imidazole:** mp: 65-67 °C,  $^1\text{H}$  NMR (500 MHz,  $\text{CDCl}_3$ )  $\delta$  7.61–7.57 (m, 2H), 7.48–7.45 (m, 2H), 7.38 (t,  $J$  = 4.3 Hz, 3H), 7.23 – 7.21 (m, 2H), 3.78 (s, 1H);  $^{13}\text{C}$  NMR (126 MHz,  $\text{CDCl}_3$ )  $\delta$  146.5, 135.2, 131.5, 130.2, 129.8, 122.4, 118.6, 110.3, 32.9.

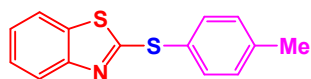

96%

Product 4d

<https://doi.org/10.1016/j.tet.2021.132564>

**2-(p-tolylthio)benzo[d]thiazole:** mp: 69-71 °C,  $^1\text{H}$  NMR (500 MHz,  $\text{CDCl}_3$ )  $\delta$  7.81 (dd,  $J$  = 7.6, 1.2 Hz, 1H), 7.60–7.57 (m, 2H), 7.37–7.33 (m, 1H), 7.32–7.25 (m, 2H), 7.23–7.20 (m, 1H), 2.50 (s, 3H);  $^{13}\text{C}$  NMR (126 MHz,  $\text{CDCl}_3$ )  $\delta$  165.3, 153.6, 135.9, 134.1, 130.5, 130.2, 129.7, 126.3, 124.2, 121.5, 120.8, 22.5.

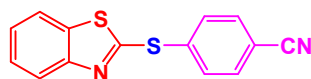

92%

Product 4e

DOI

<https://doi.org/10.1039/C7CC03107F>

## Supplementary Information

**4-(benzo[d]thiazol-2-ylthio)benzotrile:** mp: 110-112 °C,  $^1\text{H}$  NMR (500 MHz,  $\text{CDCl}_3$ )  $\delta$  7.88 (d,  $J$  = 7.7 Hz, 1H), 7.69–7.65 (m, 3H), 7.46-7.40(m, 2H), 7.31 (d,  $J$  = 4.5 Hz, 1H), 7.29 (d,  $J$  = 4.6 Hz, 1H);  $^{13}\text{C}$  NMR (126 MHz,  $\text{CDCl}_3$ )  $\delta$  167.2, 153.4, 136.5, 136.2, 135.7, 130.3, 128.5, 126.3, 124.6, 122.0, 120.1.

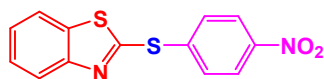

91%

Product 4f

DOI: 10.1039/C9NJ04440J

**2-((4-nitrophenyl)thio)benzo[d]thiazole:** mp: 86-89 °C,  $^1\text{H}$  NMR (500 MHz,  $\text{CDCl}_3$ )  $\delta$  8.00–7.95 (m, 2H), 7.65–7.63 (m, 2H), 7.45–7.41 (m, 2H), 7.20–7.14 (m, 2H);  $^{13}\text{C}$  NMR (126 MHz,  $\text{CDCl}_3$ )  $\delta$  161.1, 158.3, 142.8, 141.3, 139.5, 138.0, 130.2, 129.7, 128.6, 127.9, 118.4, 115.7.

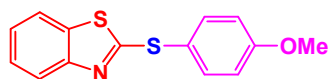

98%

Product 4g

<https://doi.org/10.1016/j.tet.2021.132564>

**2-((4-methoxyphenyl)thio)benzo[d]thiazole:** mp: 55-57 °C,  $^1\text{H}$  NMR (500 MHz,  $\text{CDCl}_3$ )  $\delta$  7.84 (d,  $J$  = 7.6 Hz, 1H), 7.65-7.60 (m, 2H), 7.38–7.35 (m, 1H), 7.26 (d,  $J$  = 7.5 Hz, 1H), 7.22-7.00 (m, 3H), 3.89(s, 3H);  $^{13}\text{C}$  NMR (126 MHz,  $\text{CDCl}_3$ )  $\delta$  170.2, 161.0, 154.9, 137.6, 135.7, 126.12, 124.3, 121.5, 120.8, 120.2, 115.5.

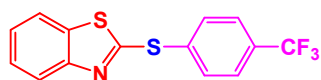

86%

Product 4h

DOI <https://doi.org/10.1039/C7CC03107F>

**2-((4-(trifluoromethyl)phenyl)thio)benzo[d]thiazole:** mp: 58-60 °C,  $^1\text{H}$  NMR (500 MHz,  $\text{CDCl}_3$ ) 8.02 (d,  $J$  = 7.8 Hz, 1H), 7.85 (d,  $J$  = 7.8 Hz, 3H), 7.69–7.65 (m, 2H), 7.64-7.60(m, 1H), 7.59-7.57(m, 1H);  $^{13}\text{C}$  NMR (126 MHz,  $\text{CDCl}_3$ )  $\delta$  165.2, 141.0, 140.9, 139.5, 137.4, 136.5, 130.6, 129.7, 129.1, 128.7, 127.9, 127.3.

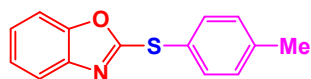

96%

Product 4i

<https://doi.org/10.1021/acs.joc.8b01644>

**2-(p-tolylthio)benzo[d]oxazole:** Colorless oil,  $^1\text{H}$  NMR (500 MHz,  $\text{CDCl}_3$ )  $\delta$  7.71 (d,  $J$  = 7.7 Hz, 2H), 7.61-7.55 (m, 2H), 7.31–7.24 (m, 2H), 7.21-7.18 (m, 2H), 2.54(s, 3H);  $^{13}\text{C}$  NMR (126 MHz,  $\text{CDCl}_3$ )  $\delta$  157.0, 155.2, 143.6, 141.5, 138.7, 130.5, 129.7, 127.3, 126.1, 120.3, 115.2, 22.5.

## Supplementary Information

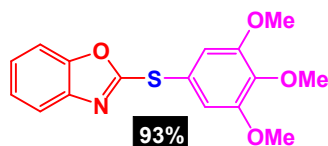

Product 4j

<https://doi.org/10.1021/jo402586v>

**2-((3,4,5-trimethoxyphenyl)thio)benzo[d]oxazole:** mp: 127-129 °C,  $^1\text{H}$  NMR (500 MHz,  $\text{CDCl}_3$ )  $\delta$  7.85 (d,  $J = 8.3$  Hz, 1H), 7.62 (d,  $J = 8.0$  Hz, 1H), 7.43 (td,  $J = 7.7, 1.3$  Hz, 1H), 7.26 (td,  $J = 7.5, 1.3$  Hz, 1H), 7.10 (s, 2H), 3.85 (s, 6H), 3.64 (s, 3H);  $^{13}\text{C}$  NMR (126 MHz,  $\text{CDCl}_3$ )  $\delta$  170.2, 155.3, 145.6, 141.2, 135.8, 130.7, 126.7, 125.3, 124.1, 121.0, 120.8, 58.9, 58.2.

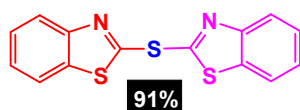

Product 4k

DOI <https://doi.org/10.1039/D2OB02216H>

**bis(benzo[d]thiazol-2-yl)sulfane:** mp: 100-102 °C,  $^1\text{H}$  NMR (500 MHz,  $\text{CDCl}_3$ )  $\delta$  7.85 (dd,  $J = 8.6$  Hz, 2H), 7.65-7.60 (m), 7.45-7.40 (m, 4H);  $^{13}\text{C}$  NMR (101 MHz,  $\text{CDCl}_3$ )  $\delta$  168.8, 141.6, 137.0, 135.9, 134.5, 130.2, 129.2, 127.3, 125.9.

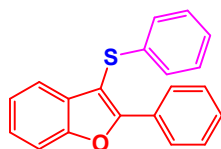

Product 4l

<https://doi.org/10.1021/jo9016309>

**2-phenyl-3-(phenylthio)benzofuran:** mp: 66-68 °C,  $^1\text{H}$  NMR (500 MHz,  $\text{CDCl}_3$ )  $\delta$  8.24 (dd,  $J = 8.3$  Hz, 2H), 7.56 (d,  $J = 8.2$  Hz, 1H), 7.48-7.41 (m, 5H), 7.37-7.23 (m, 5H), 7.22-7.16 (m, 1H);  $^{13}\text{C}$  NMR (101 MHz,  $\text{CDCl}_3$ )  $\delta$  157.8, 153.2, 136.5, 130.6, 129.7, 129.4, 129.0, 128.7, 127.3, 126.5, 125.9, 125.4, 123.4, 120.5, 111.3, 104.9.

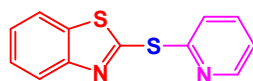

Product 4m

DOI <https://doi.org/10.1039/D0OB00684J>

**2-(pyridin-2-ylthio)benzo[d]thiazole:** mp: 66-68 °C,  $^1\text{H}$  NMR (500 MHz,  $\text{CDCl}_3$ )  $\delta$  9.26 (d,  $J = 1.8$  Hz, 1H), 8.81 (dd,  $J = 4.9, 1.7$  Hz, 1H), 8.29 (ddd,  $J = 8.1, 2.3, 1.8$  Hz, 1H), 7.55-7.45 (m, 4H), 7.44 (ddd,  $J = 8.1, 4.9, 1.8$  Hz, 1H);  $^{13}\text{C}$  NMR (126 MHz,  $\text{CDCl}_3$ )  $\delta$  161.3, 154.6, 149.7, 136.5, 135.1, 132.5, 129.8, 128.9, 126.3, 122.4.



## Supplementary Information

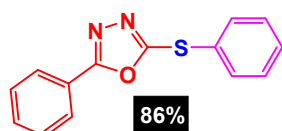

Product 4n

<https://doi.org/10.1016/j.tet.2011.02.064>

**2-phenyl-5-(phenylthio)-1,3,4-oxadiazole:** mp: 60-62 °C, <sup>1</sup>H NMR (500 MHz, CDCl<sub>3</sub>) δ 7.91 (d, J = 7.6 Hz, 2 H), 7.70-7.64 (m, 2 H), 7.59 (t, J = 7.2 Hz, 1 H), 7.49-7.42 (m, 5 H); <sup>13</sup>C NMR (126 MHz, CDCl<sub>3</sub>) δ 166.9, 166.1, 133.8, 132.4, 130.8, 130.2, 129.8, 127.6, 126.4, 123.9.

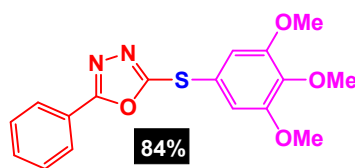

Product 4o

<https://doi.org/10.1021/jo402586v>

**2-phenyl-5-((3,4,5-trimethoxyphenyl)thio)-1,3,4-oxadiazole:** mp: 140-142 °C, <sup>1</sup>H NMR (500 MHz, CDCl<sub>3</sub>) δ 7.97 (d, J = 6.7 Hz, 2H), 7.52-7.50 (m, 3H), 6.95 (s, 2H), 3.97 (s, 9H); <sup>13</sup>C NMR (126 MHz, CDCl<sub>3</sub>) δ 166.6, 163.9, 153.2, 140.3, 132.3, 130.0, 126.4, 123.7, 121.5, 111.3, 61.7, 55.5

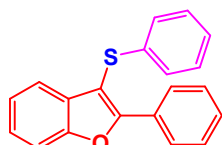

Product 4l

DOI: 10.1055/s-0037-1612082

**2-phenyl-3-(phenylthio)imidazo[1,2-a]pyridine:** mp: 92-94 °C, <sup>1</sup>H NMR (500 MHz, CDCl<sub>3</sub>) δ 8.25 (d, 1H, J = 6.8 Hz), 8.18 (d, 2H, J = 7.6 Hz), 7.71 (d, 1H, J = 9.2 Hz), 7.45 (t, 2H, J = 7.7 Hz), 7.38 (d, 1H, J = 7.3 Hz), 7.30 (t, 1H, J = 8 Hz), 7.17 (t, 2H, J = 7.6 Hz), 7.11 (t, 1H, J = 7.6 Hz), 6.97 (d, 2H, J = 7.6 Hz), 6.85 (t, 1H, J = 6.7 Hz); <sup>13</sup>C NMR (126 MHz, CDCl<sub>3</sub>) δ 151.0, 147.2, 133.5, 129.7, 128.5, 128.3, 127.4, 126.2, 125.6, 125.3, 124.5, 117.3, 112.2, 106.3.

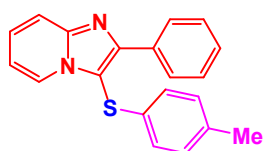

Product 4q

DOI: 10.1055/s-0037-1612082

**2-phenyl-3-(p-tolylthio)imidazo[1,2-a]pyridine:** mp: 135-137 °C, <sup>1</sup>H NMR (500 MHz, CDCl<sub>3</sub>) δ 8.28 (d, 1H, J = 6.5 Hz), 8.21 (d, 2H, J = 7.5 Hz), 7.71 (d, 1H, J = 9.1 Hz), 7.46 (t, 2H, J = 7.6 Hz), 7.37 (d, 1H, J = 7.3 Hz), 7.28 (t, 1H, J = 8 Hz), 7.02 (d, 2H, J = 8 Hz), 6.95 (d, 2H, J = 8.1 Hz), 6.87 (t, 1H, J = 6.7 Hz), 2.38 (s, 3H); <sup>13</sup>C NMR (126 MHz, CDCl<sub>3</sub>) δ 152.0, 145.3, 136.8, 133.5, 131.2, 130.7, 129.7, 128.6, 128.0, 126.4, 125.7, 117.9, 112.4, 106.3, 21.3.

## Supplementary Information

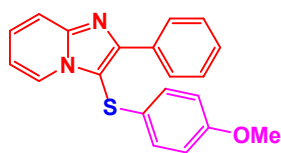

90%

Product 4r

DOI: 10.1055/s-0037-1612082

**3-((4-methoxyphenyl)thio)-2-phenylimidazo[1,2-a]pyridine:** mp: 112-114 °C,  $^1\text{H}$  NMR (500 MHz,  $\text{CDCl}_3$ )  $\delta$  8.29 (d, 1H,  $J = 6.1$  Hz), 8.22 (d, 2H,  $J = 8.2$  Hz), 7.71 (d, 1H,  $J = 8.6$  Hz), 7.42-7.40 (m, 2H), 7.35 (t, 1H,  $J = 5.7$  Hz), 7.29-7.27 (m, 1H), 6.97 (d, 2H,  $J = 8.3$  Hz), 6.85 (t, 1H,  $J = 5.6$  Hz), 6.75 (d, 2H,  $J = 8.6$  Hz), 3.70 (s, 3H).;  $^{13}\text{C}$  NMR (126 MHz,  $\text{CDCl}_3$ )  $\delta$  158.6, 150.2, 146.7, 133.6, 130.9, 129.7, 128.8, 128.6, 127.7, 126.4, 125.7, 117.7, 115.9, 112.6, 107.4, 55.3.

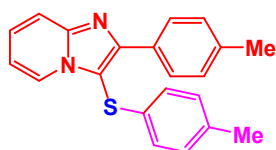

87%

Product 4s

DOI: 10.1055/s-0037-1612082

**2-(p-tolyl)-3-(p-tolylthio)imidazo[1,2-a]pyridine:** mp: 142-144 °C,  $^1\text{H}$  NMR (500 MHz,  $\text{CDCl}_3$ )  $\delta$  8.24 (d, 1H,  $J = 6.8$  Hz), 8.12 (d, 2H,  $J = 7.8$  Hz), 7.70 (d, 1H,  $J = 9.1$  Hz), 7.33 (t, 1H,  $J = 7.6$  Hz), 7.25 (d, 2H,  $J = 8.3$  Hz), 7.02 (d, 2H,  $J = 7.7$  Hz), 6.92 (d, 2H,  $J = 7.7$  Hz), 6.83 (t, 1H,  $J = 6.7$  Hz), 2.38 (s, 3H), 2.25 (s, 3H).;  $^{13}\text{C}$  NMR (126 MHz,  $\text{CDCl}_3$ )  $\delta$  151.1, 146.3, 138.7, 134.3, 130.7, 129.7, 129.1, 128.2, 126.4, 125.1, 124.4, 117.6, 112.7, 105.9, 21.3, 20.6.

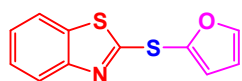

91%

Product 4t

**2-(furan-2-ylthio)benzo[d]thiazole:**  $^1\text{H}$  NMR (400 MHz,  $\text{CDCl}_3$ )  $\delta$  8.03 (dd,  $J = 8.5$  Hz, 2H), 7.45 (d,  $J = 8.8$  Hz, 2H), 6.99 (d,  $J = 8.7$  Hz, 2H), 6.95 (d,  $J = 9.2$  Hz, 1H);  $^{13}\text{C}$  NMR (101 MHz,  $\text{CDCl}_3$ )  $\delta$  164.6, 161.7, 137.6, 130.5, 129.3, 119.1, 115.3, 114.5.

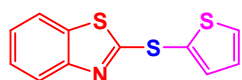

92%

Product 4u

<https://doi.org/10.1016/j.tet.2014.10.075>

## Supplementary Information

**2-(thiophen-2-ylthio)benzo[d]thiazole:**  $^1\text{H}$  NMR (400 MHz,  $\text{CDCl}_3$ )  $\delta$  7.33-7.21 (m, 2H), 7.14-7.10 (m, 2H), 6.97-6.93 (m, 3H);  $^{13}\text{C}$  NMR (101 MHz,  $\text{CDCl}_3$ )  $\delta$  168.3, 149.8, 135.0, 134.7, 132.1, 130.8, 130.2, 128.3, 117.6, 116.3, 115.4.

**Table S1.** experimental conditions for NMR analysis

| $^1\text{H}$ NMR            | $^{13}\text{C}$ NMR         |
|-----------------------------|-----------------------------|
| F2 - Acquisition Parameters | F2 - Acquisition Parameters |
| Date_       20230427        | Date_       20230427        |
| Time        14.20           | Time        13.45           |
| INSTRUM    spect            | INSTRUM    spect            |
| PROBHD    5 mm Multinucl    | PROBHD    5 mm Multinucl    |
| PULPROG    zg               | PULPROG    zgpq             |
| TD         16384            | TD         65536            |
| SOLVENT $\text{CDCl}_3$     | SOLVENT $\text{CDCl}_3$     |
| NS         10               | NS         85               |
| DS         0                | DS         0                |
| SWH        6265.664 Hz      | SWH        13812.154 Hz     |
| FIDRES     0.382426 Hz      | FIDRES     0.210757 Hz      |
| AQ         1.3074932 sec    | AQ         2.3724532 sec    |
| RG         32               | RG         1625.5           |
| DW         79.800 usec      | DW         36.200 usec      |
| DE         6.00 usec        | DE         6.00 usec        |
| TE         300.0 K          | TE         300.0 K          |
| D1         3.00000000 sec   | D1         2.00000000 sec   |
|                             | d11        0.03000000 sec   |
|                             | d12        0.00002000 sec   |
|                             | ===== CHANNEL f1            |
|                             | =====                       |
|                             | NUC1        13C             |
|                             | P1         10.00 usec       |
|                             | PL1         0.00 dB         |
|                             | SFO1       62.9015285 MHz   |
|                             | ===== CHANNEL f2            |
|                             | =====                       |
|                             | CPDPRG2    waltz16          |
|                             | NUC2        1H              |
|                             | PCPD2       80.00 usec      |
|                             | PL2         3.00 dB         |
|                             | PL12        21.50 dB        |
|                             | PL13        23.00 dB        |
|                             | SFO2       250.1310005 MHz  |
|                             | F2 - Processing parameters  |
|                             | SI         32768            |
|                             | SF         62.8955307 MHz   |
|                             | WDW        EM               |
|                             | SSB         0               |
|                             | LB         8.00 Hz          |

# Supplementary Information

|  |    |      |
|--|----|------|
|  | GB | 0    |
|  | PC | 1.40 |

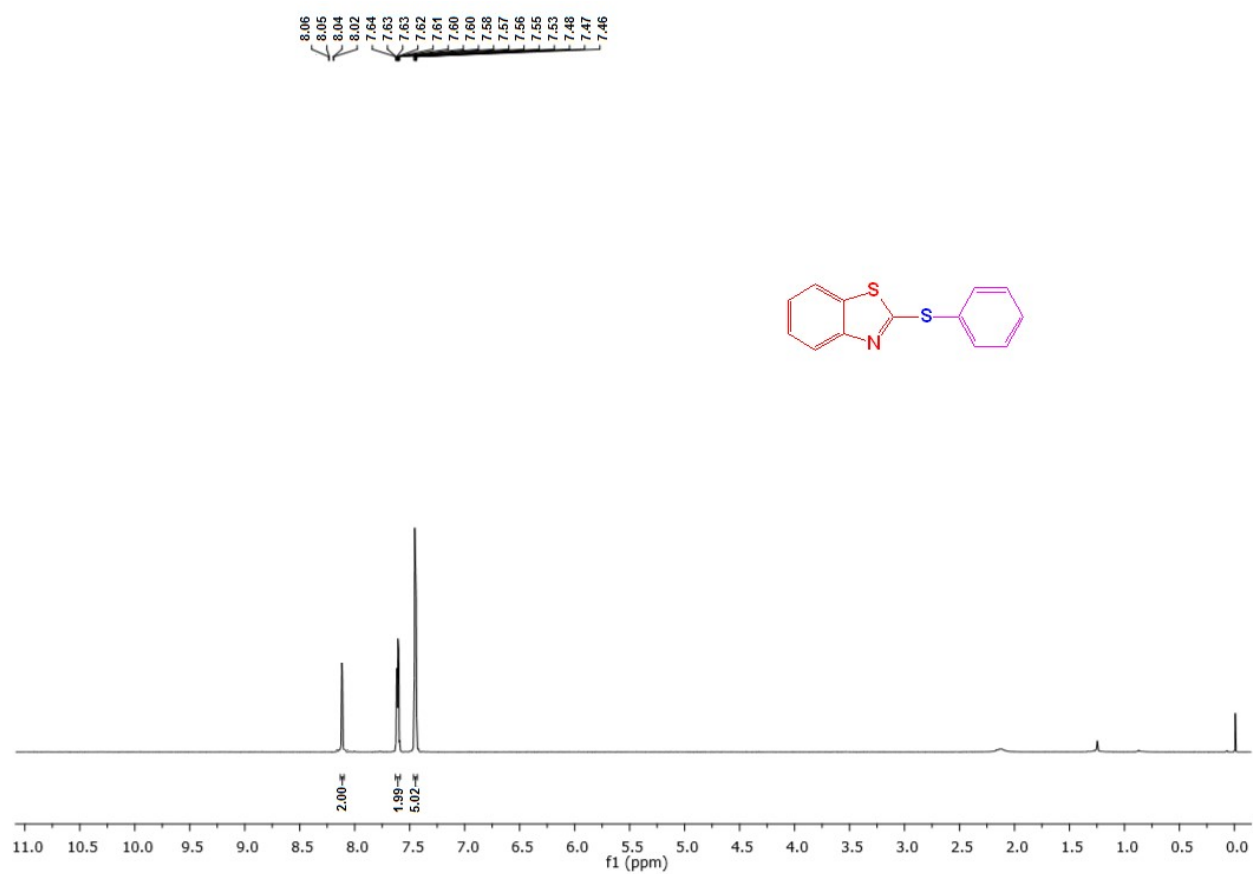

# Supplementary Information

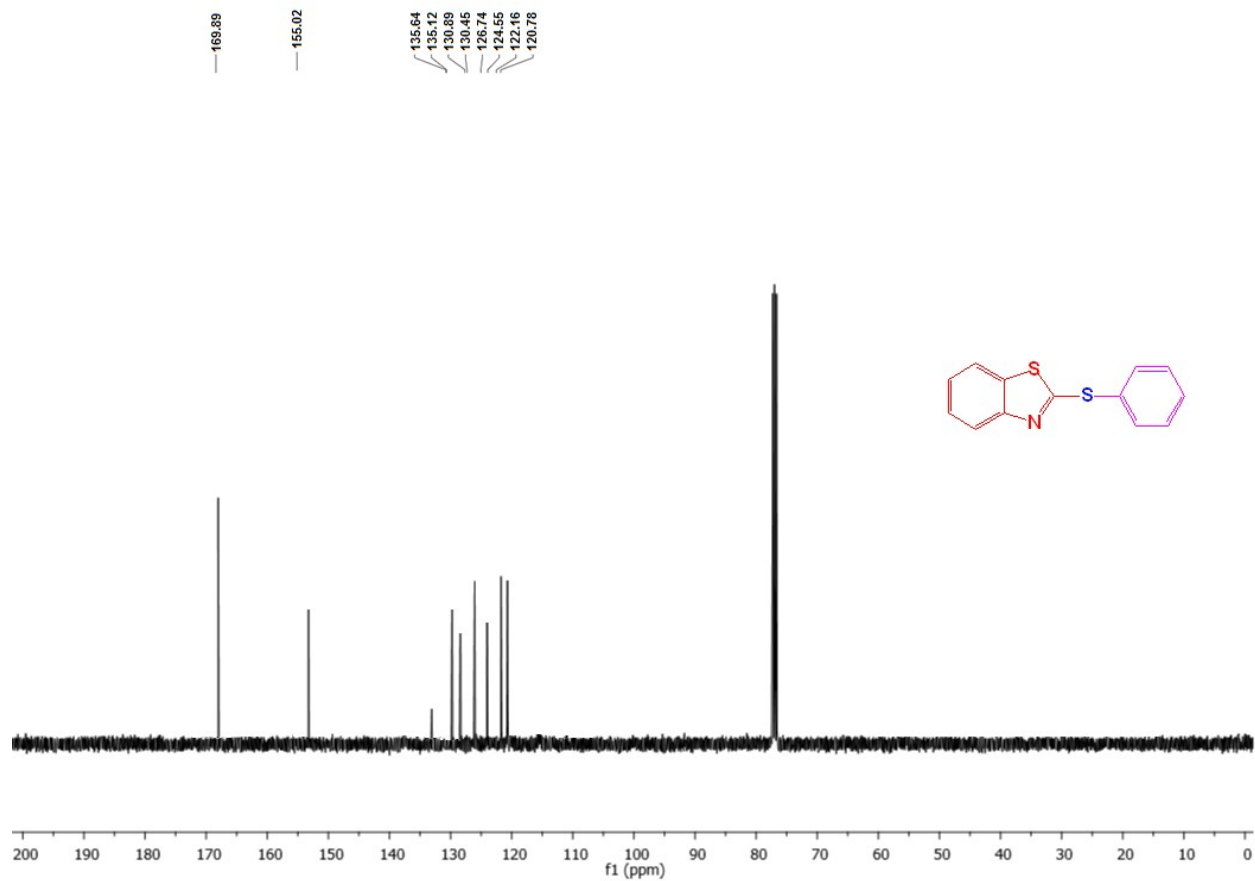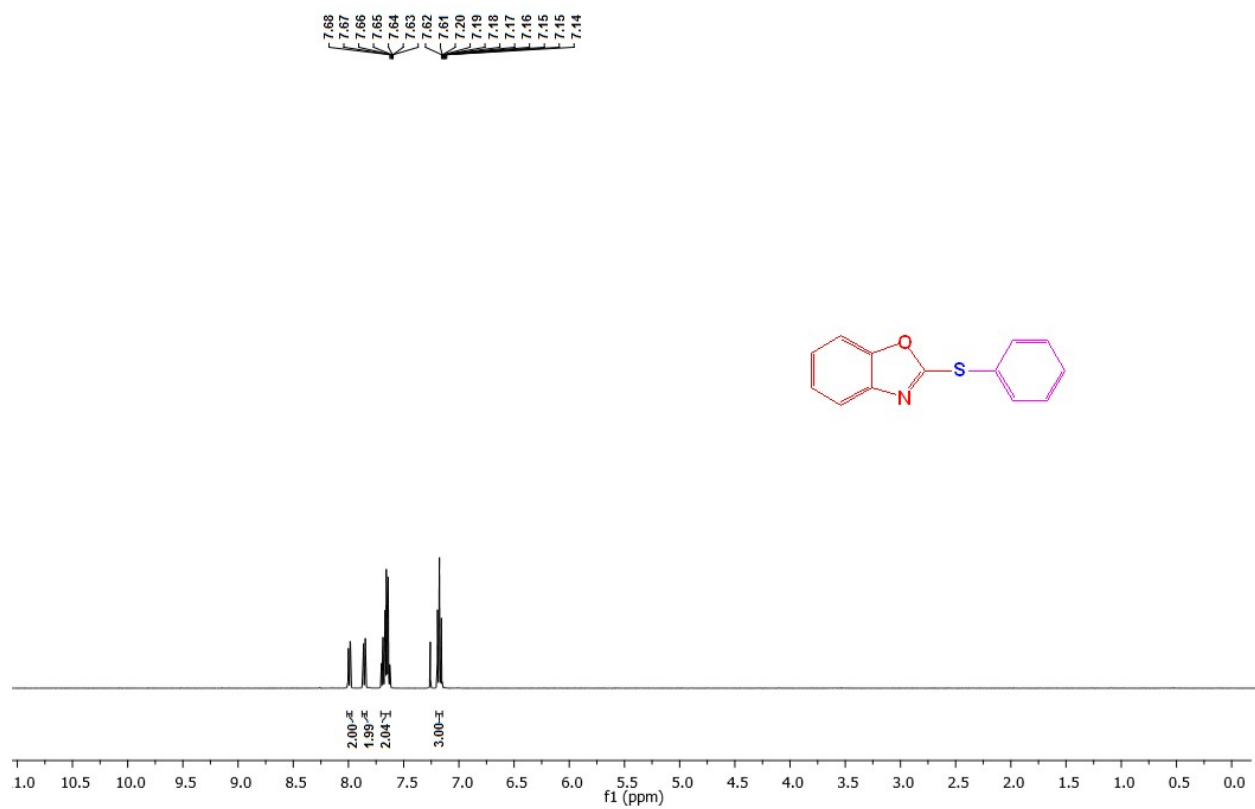

# Supplementary Information

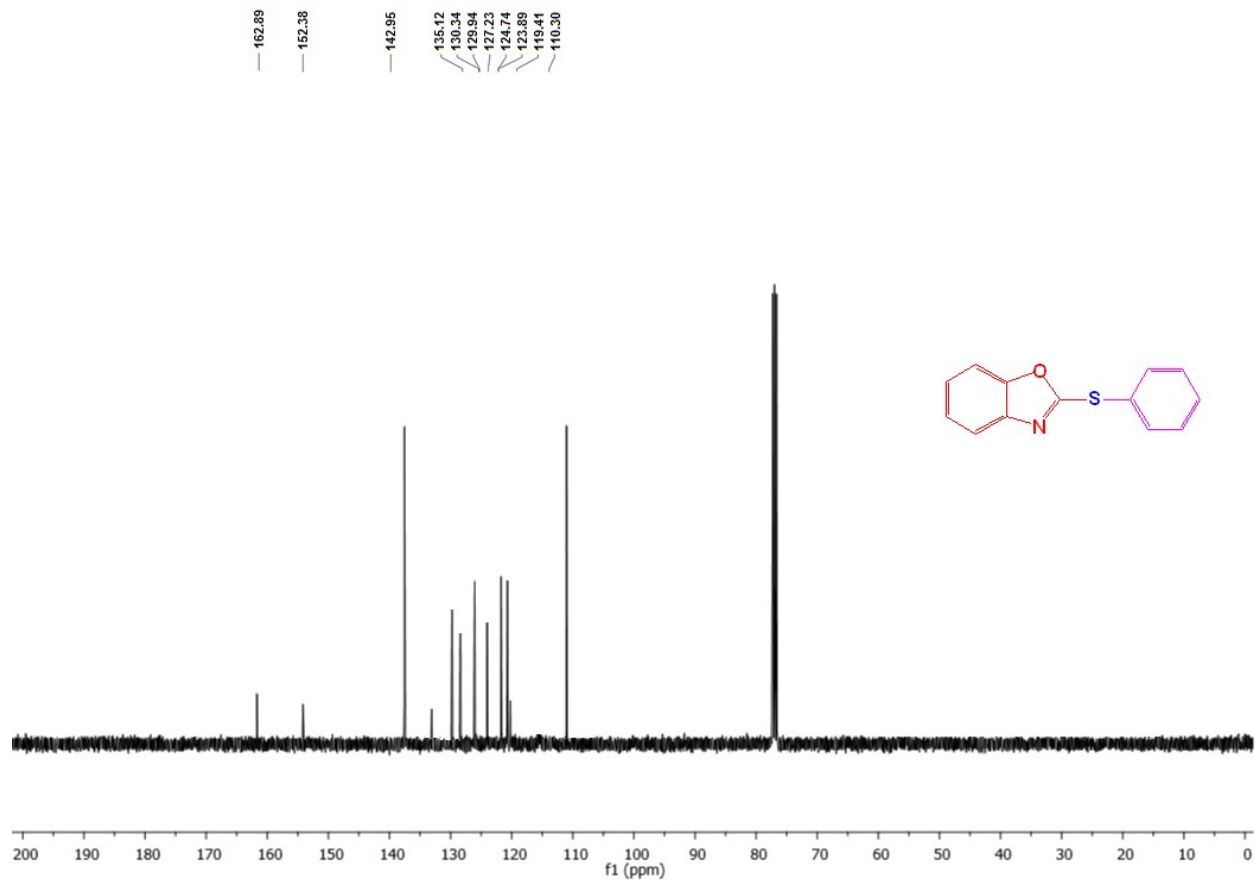

# Supplementary Information

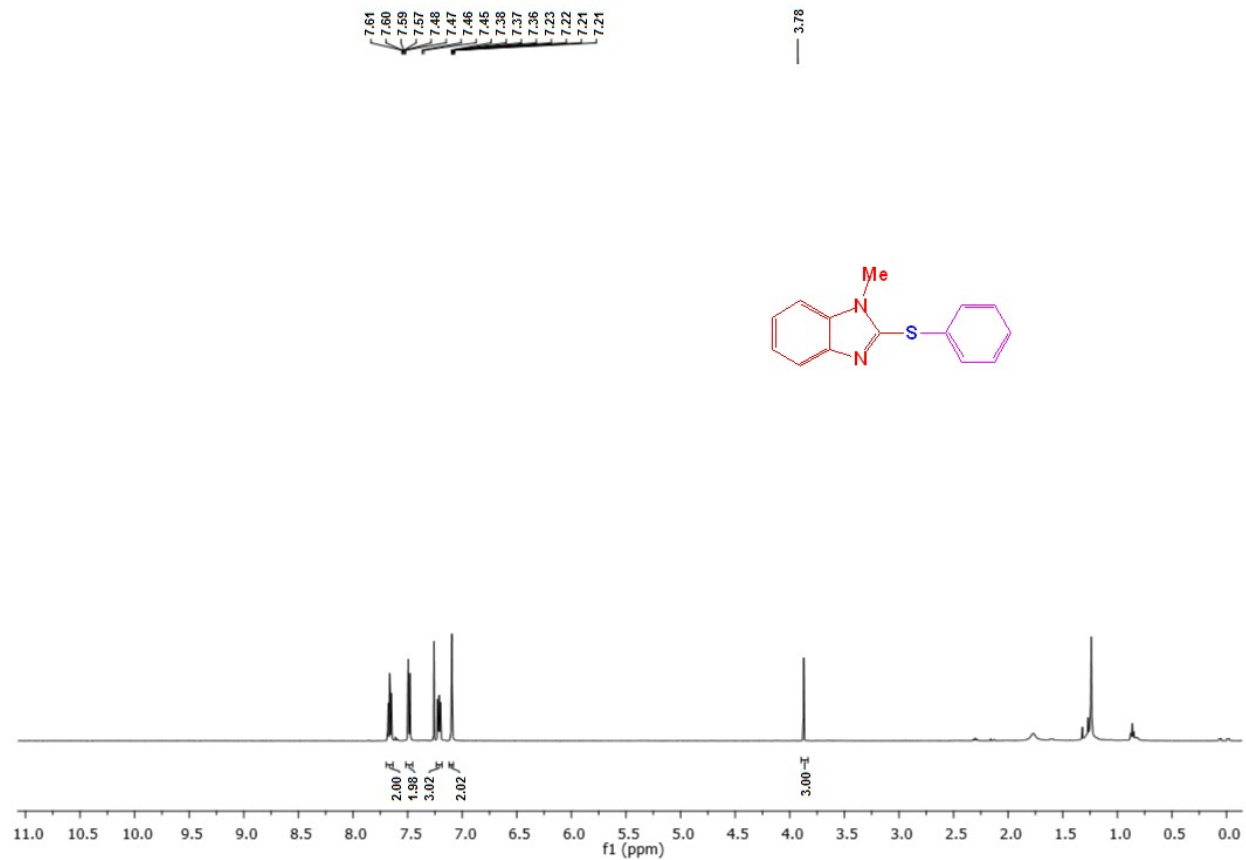

# Supplementary Information

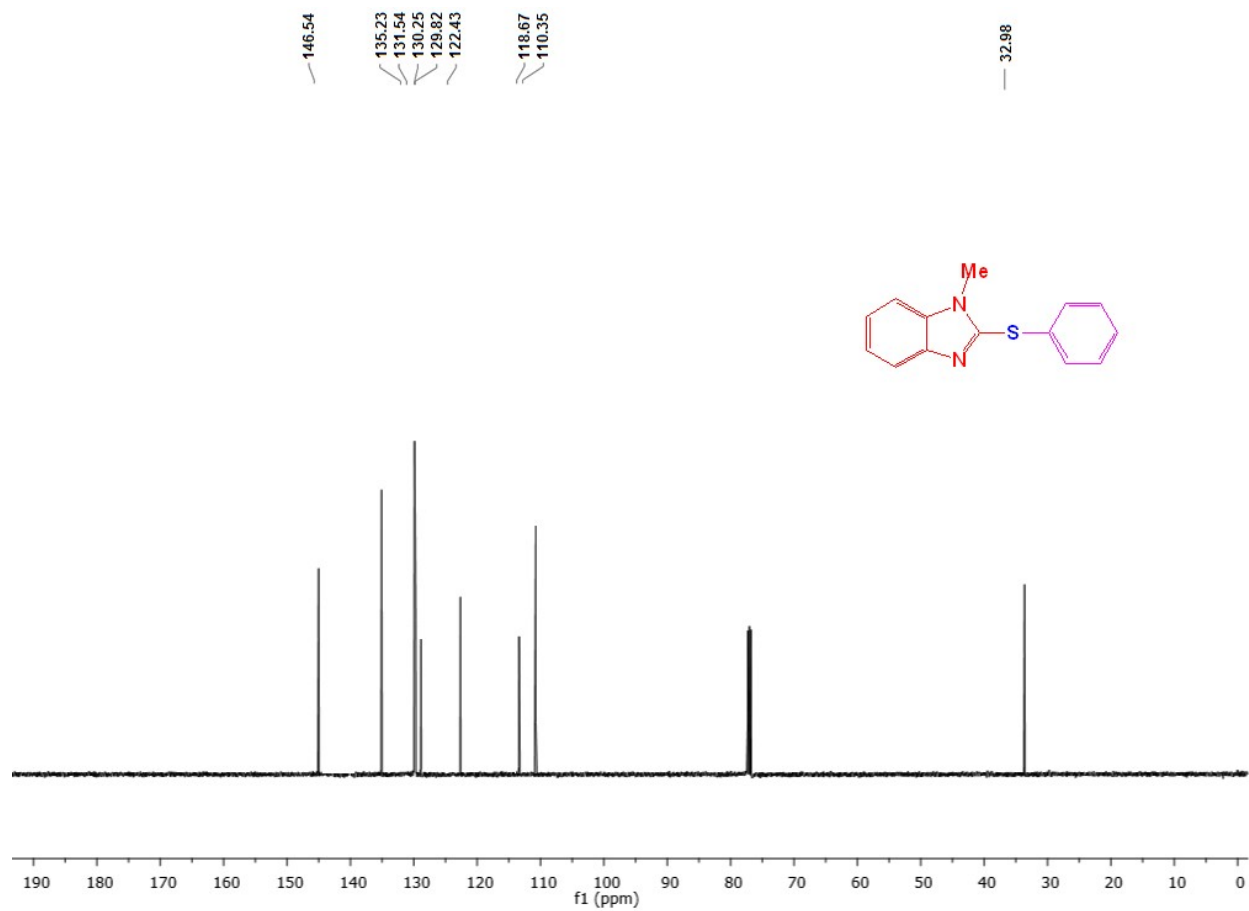



# Supplementary Information

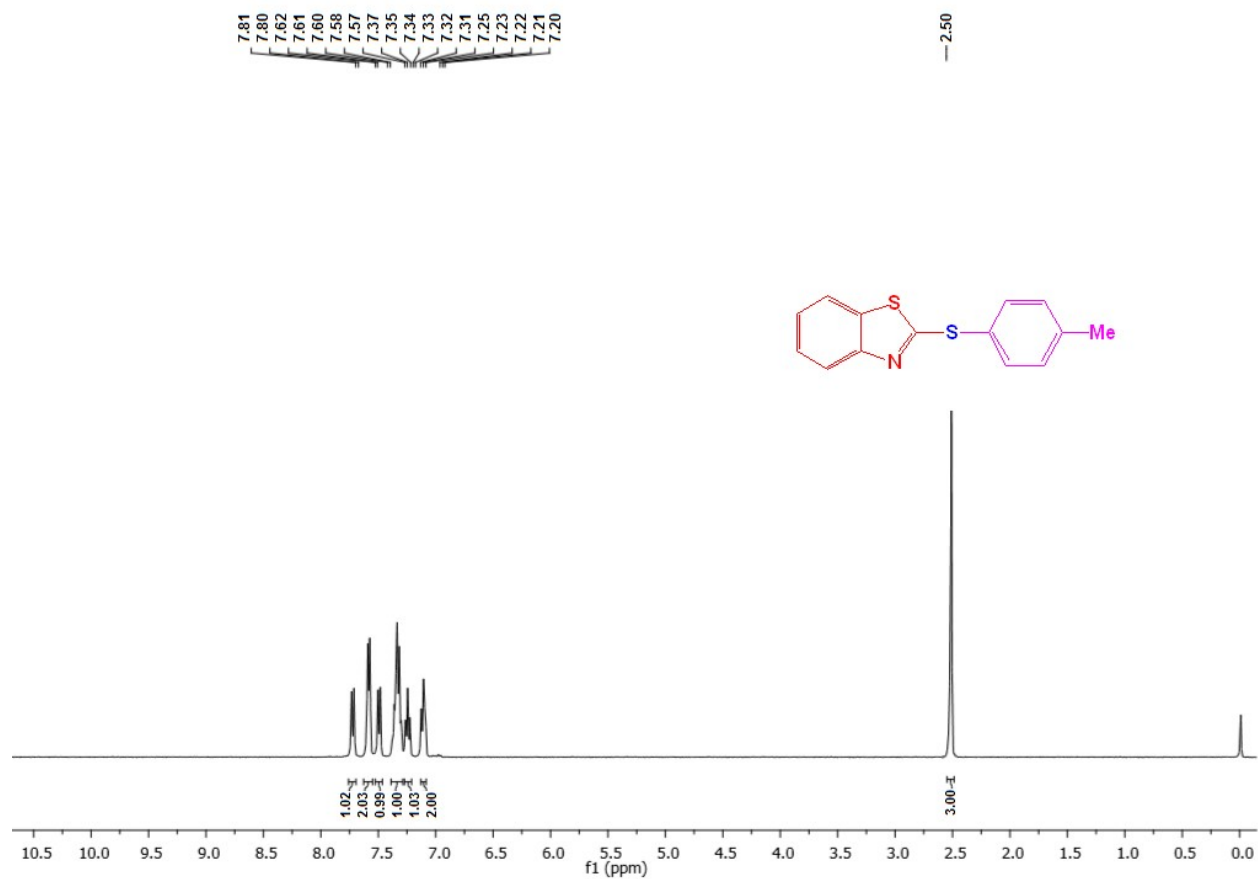

# Supplementary Information

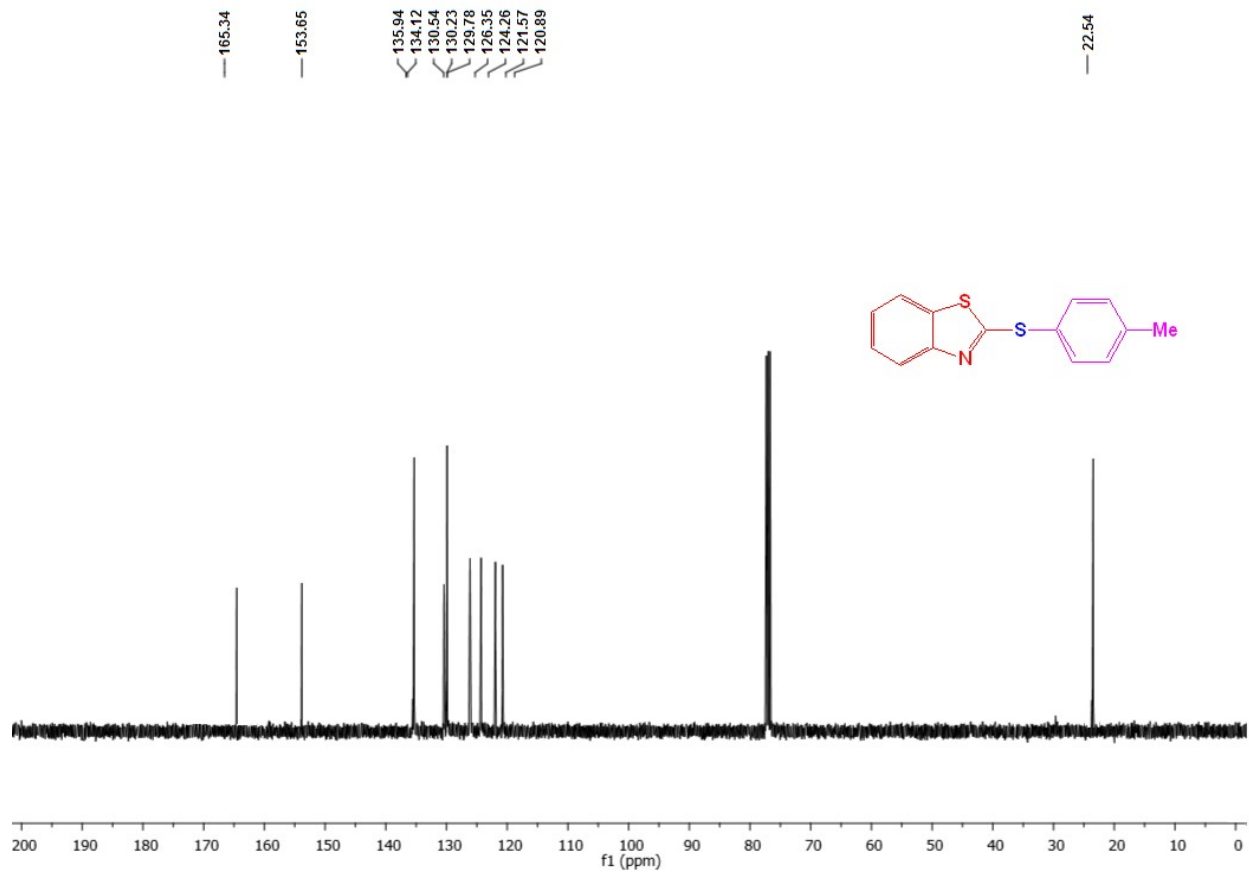

# Supplementary Information

7.88  
7.85  
7.69  
7.67  
7.65  
7.44  
7.42  
7.40  
7.31  
7.30  
7.29  
7.23

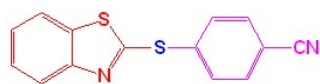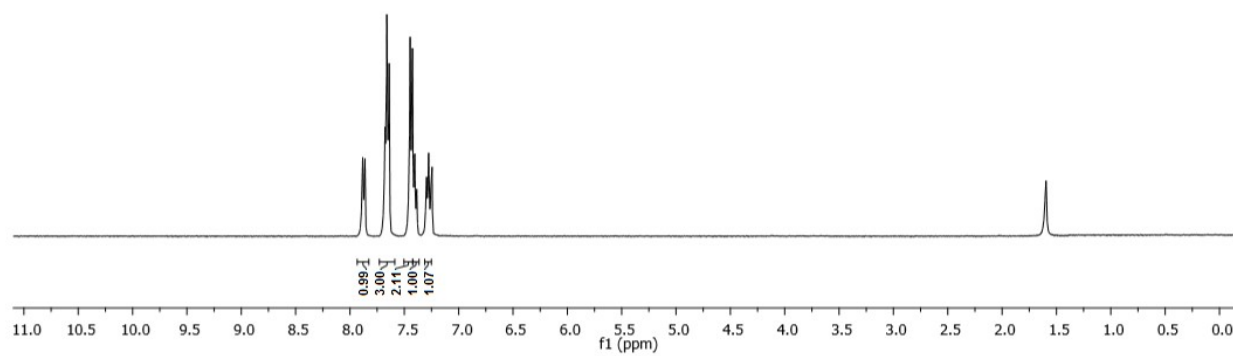

# Supplementary Information

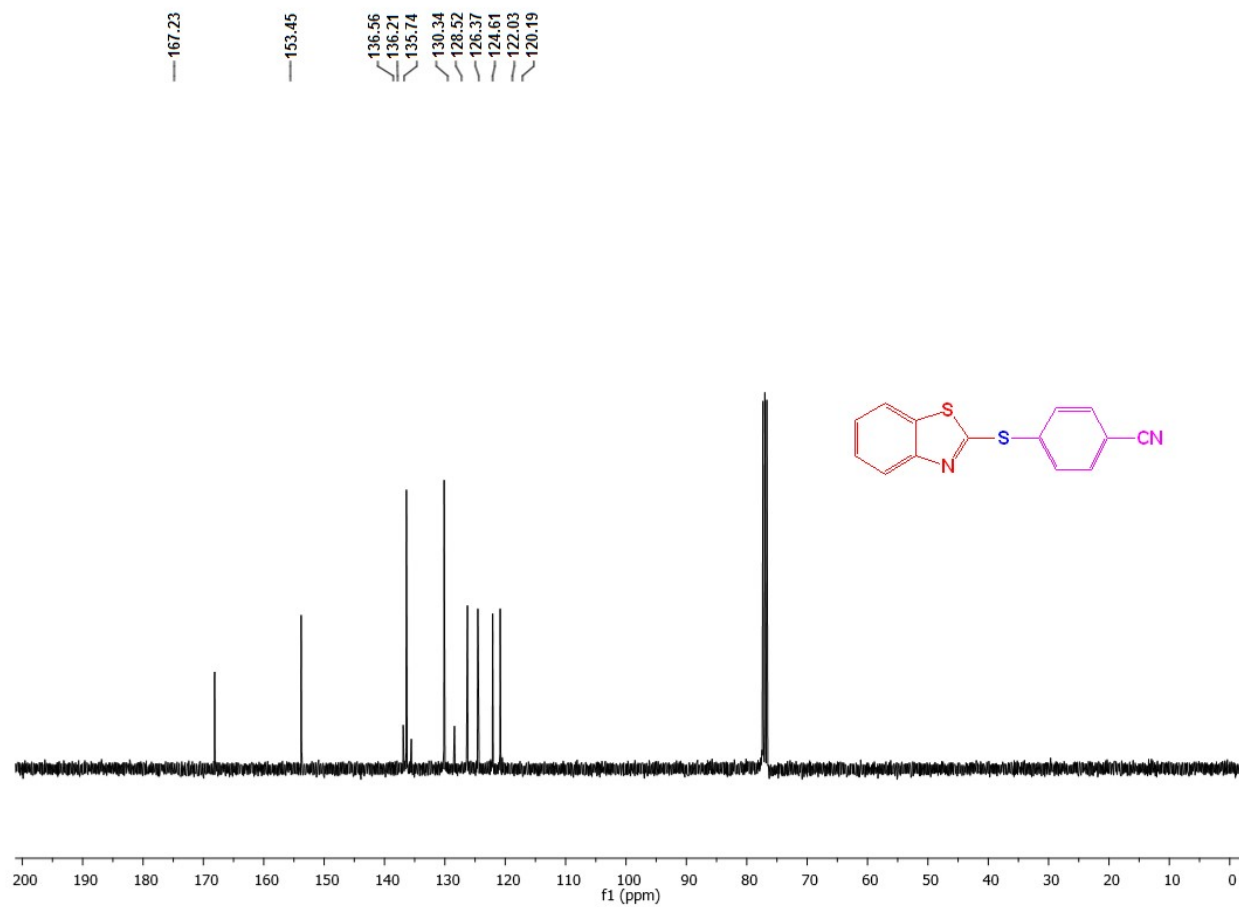

# Supplementary Information

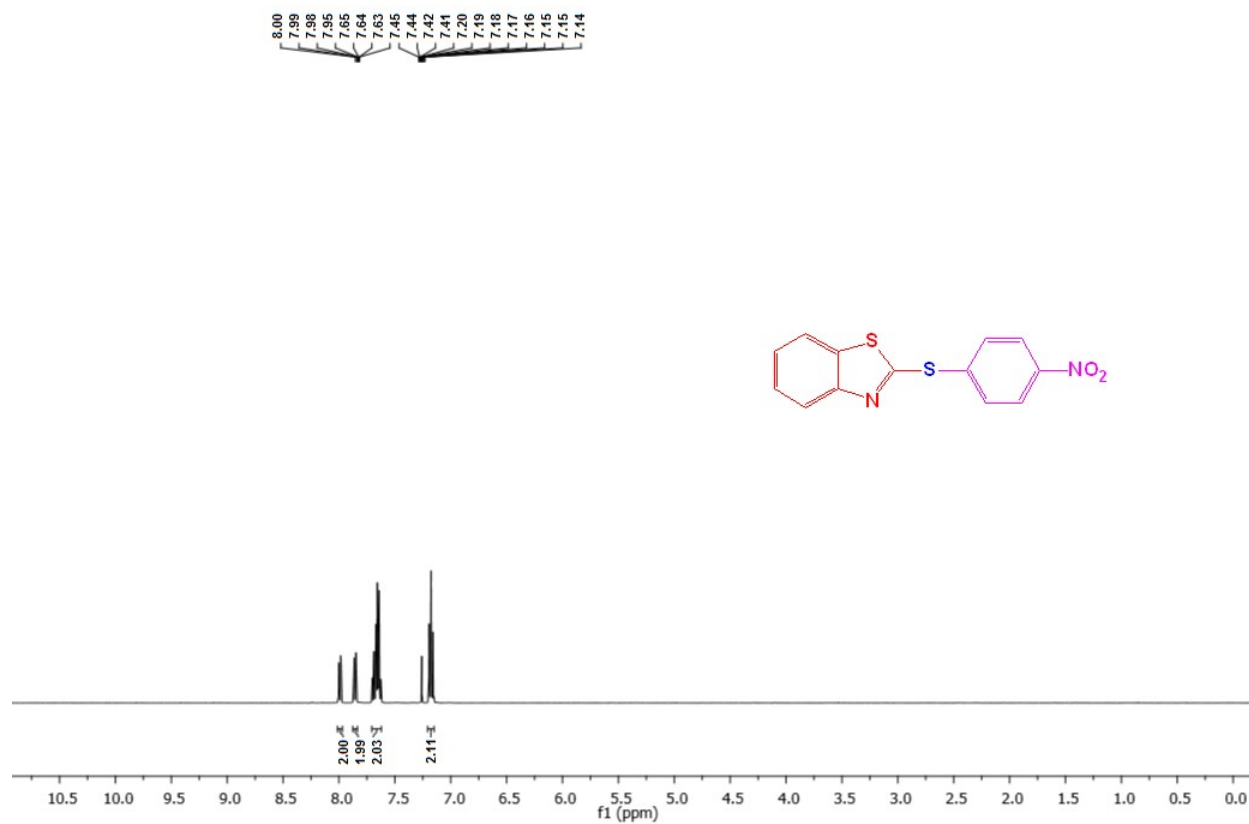

## Supplementary Information

161.11  
158.31  
142.89  
141.35  
139.54  
138.02  
130.23  
129.73  
128.68  
127.91  
118.42  
115.71

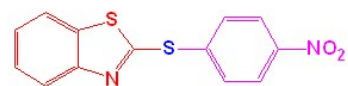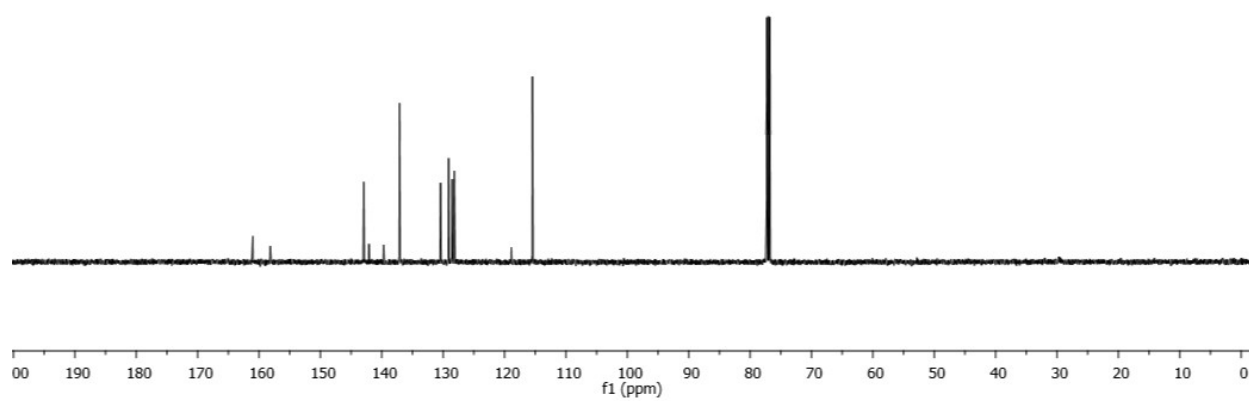

# Supplementary Information

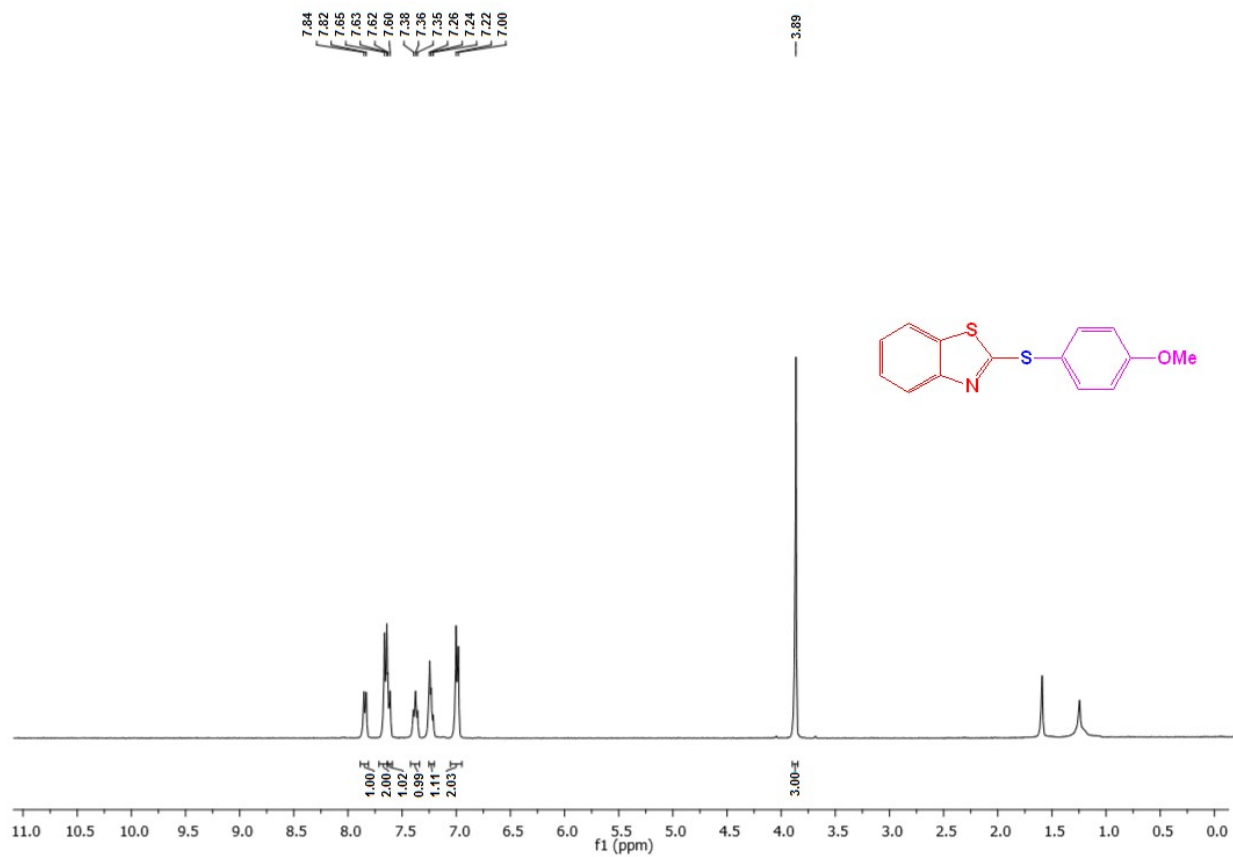

# Supplementary Information

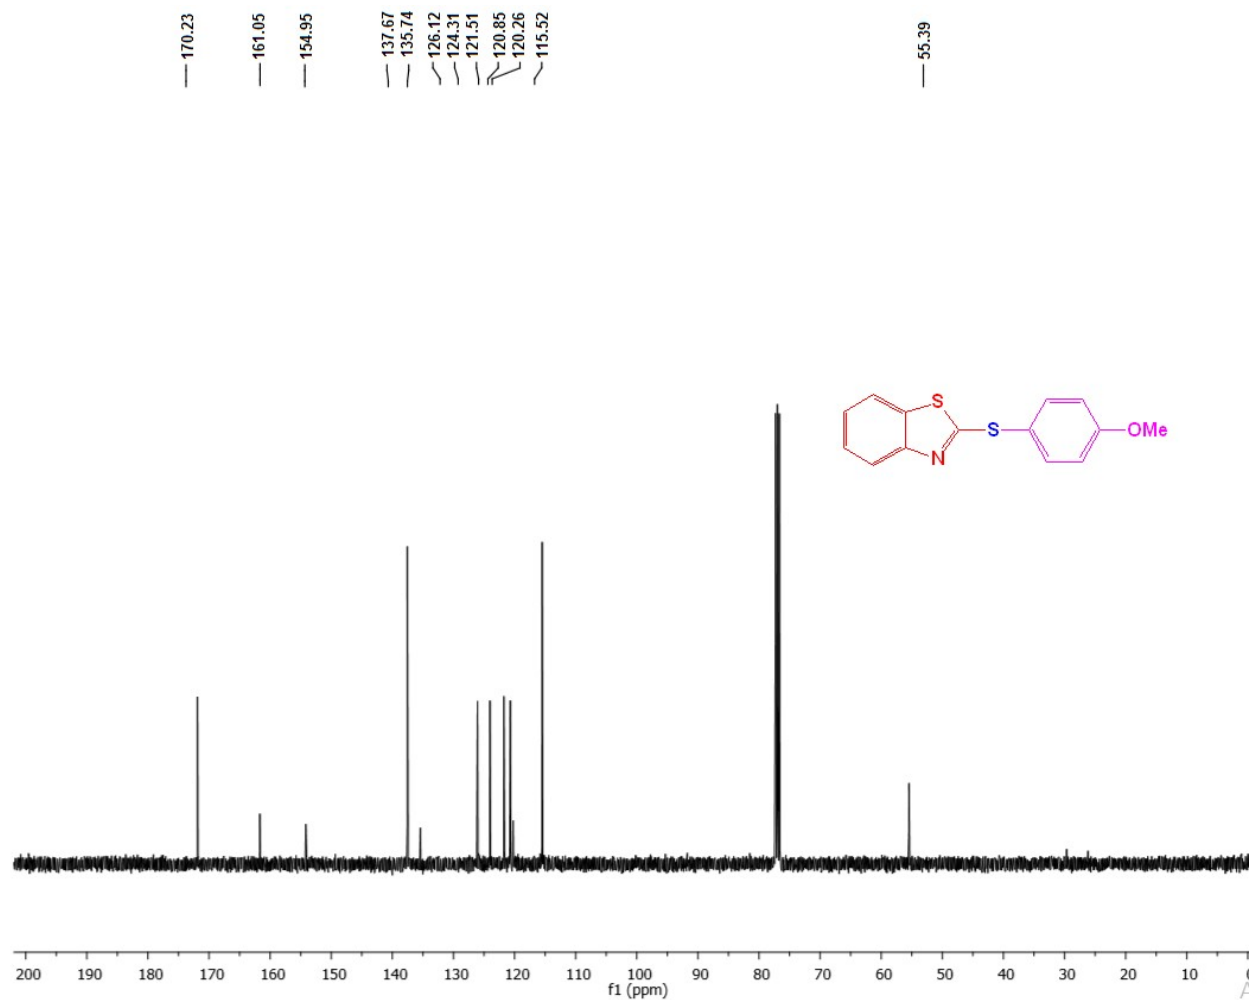



# Supplementary Information

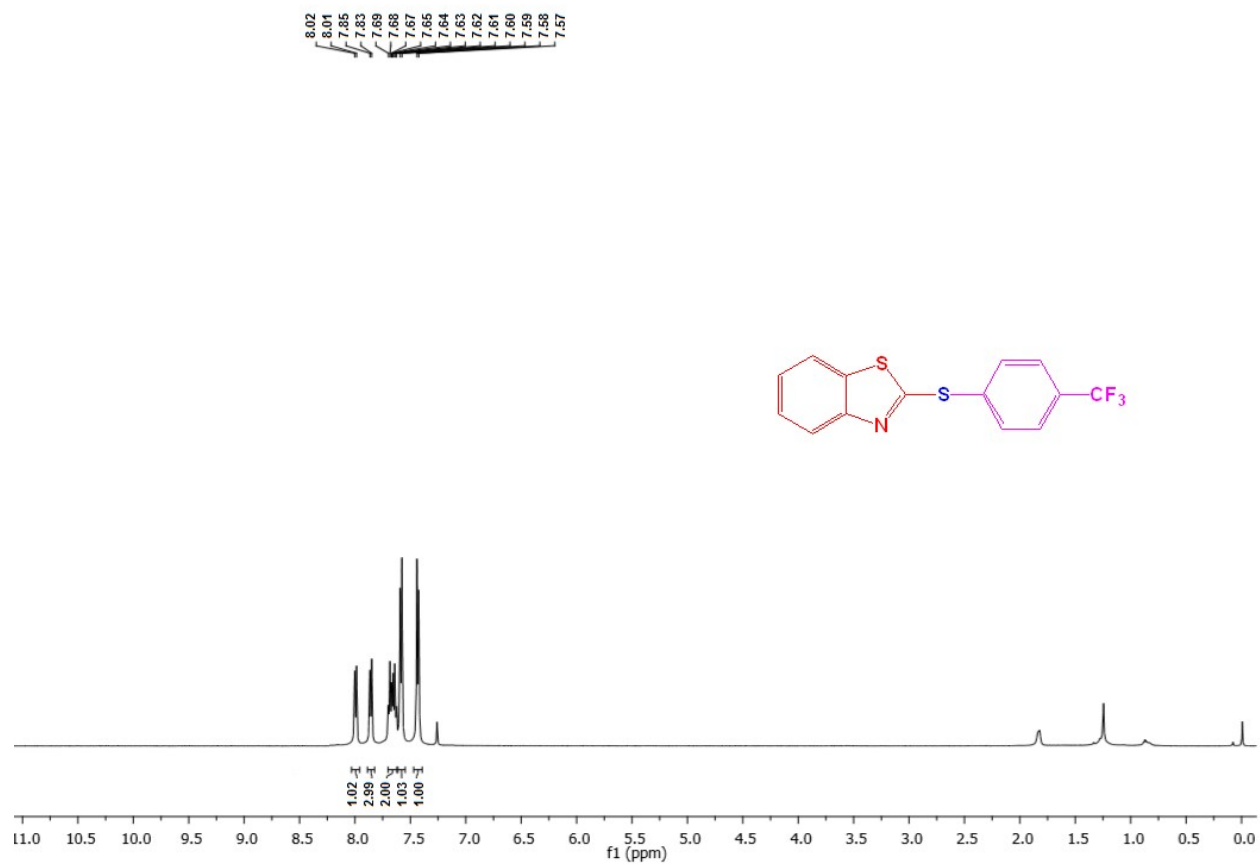

# Supplementary Information

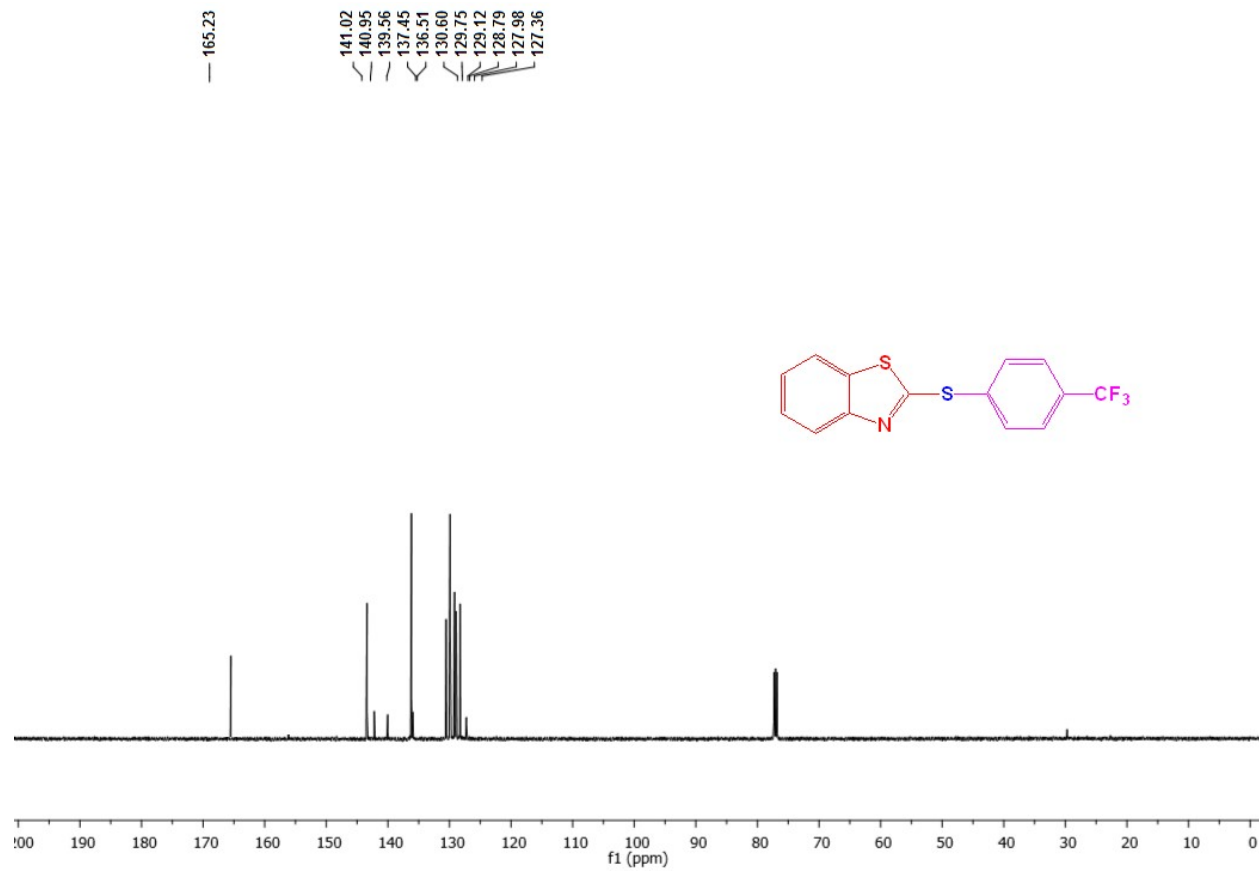

# Supplementary Information

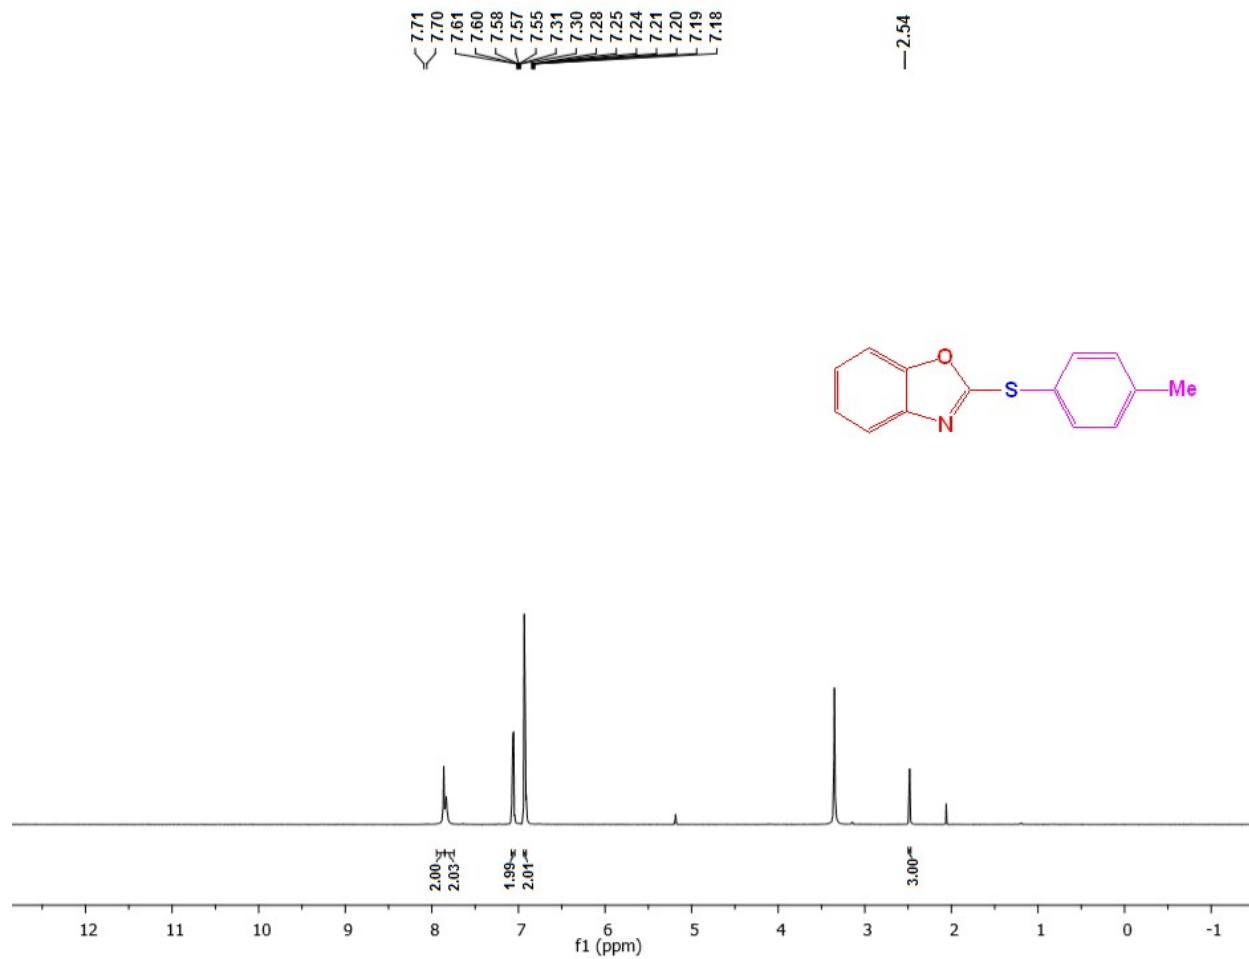

# Supplementary Information

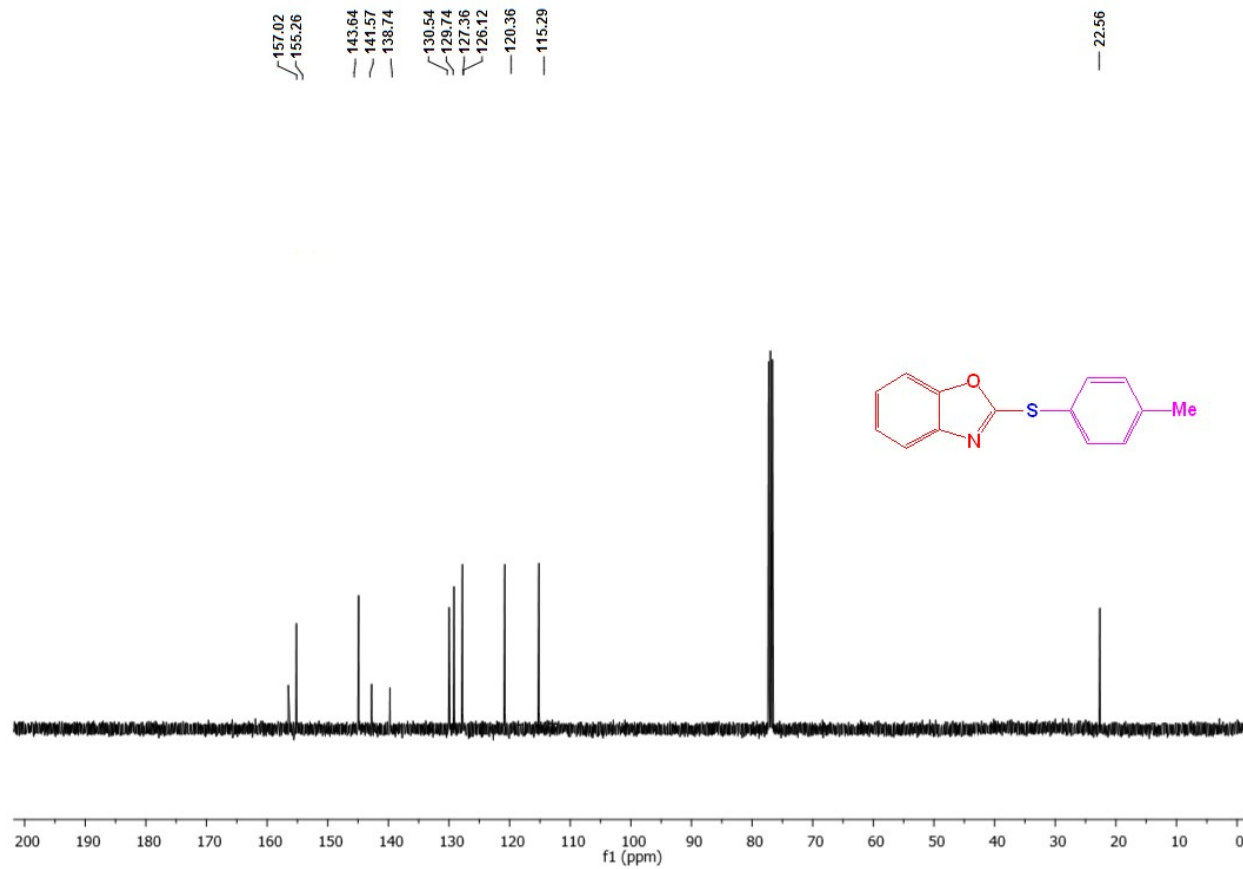

# Supplementary Information

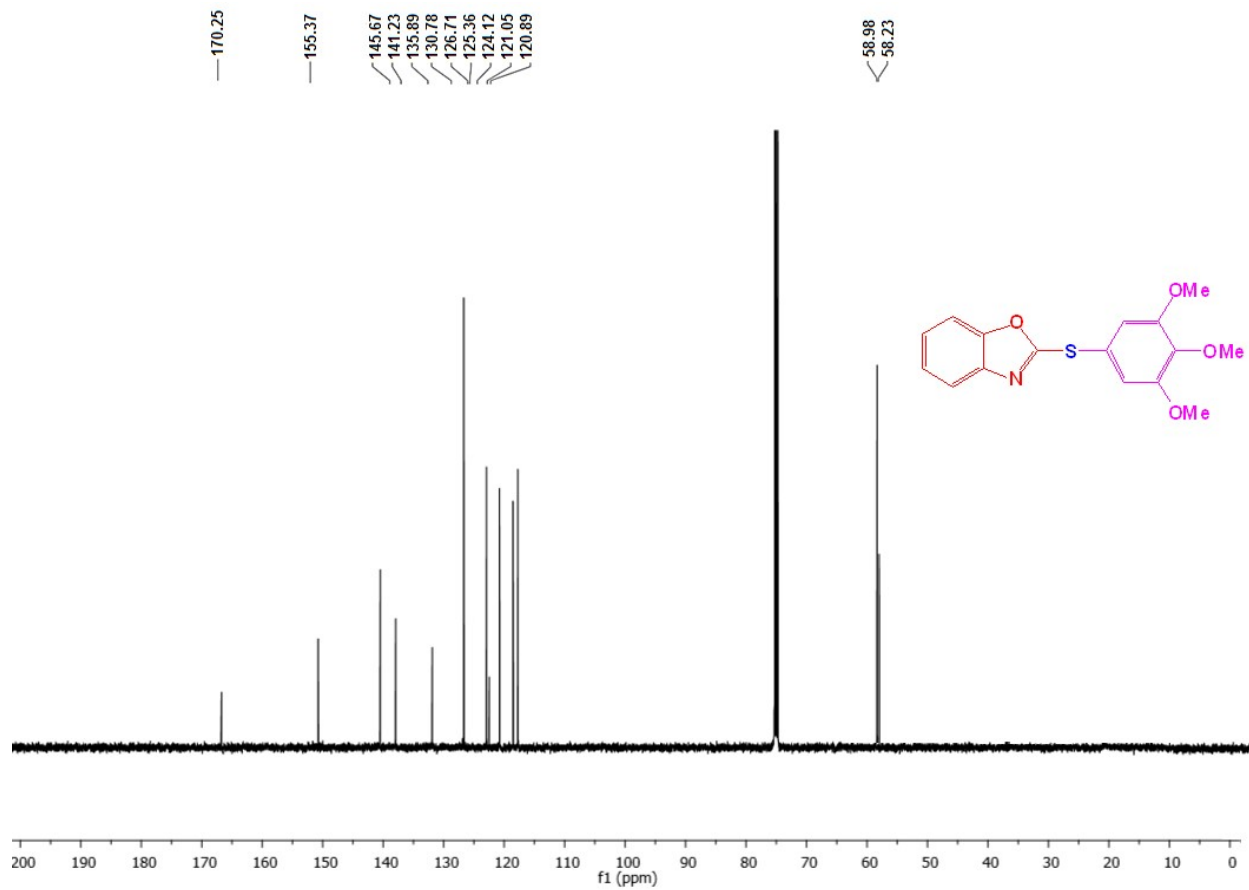

# Supplementary Information

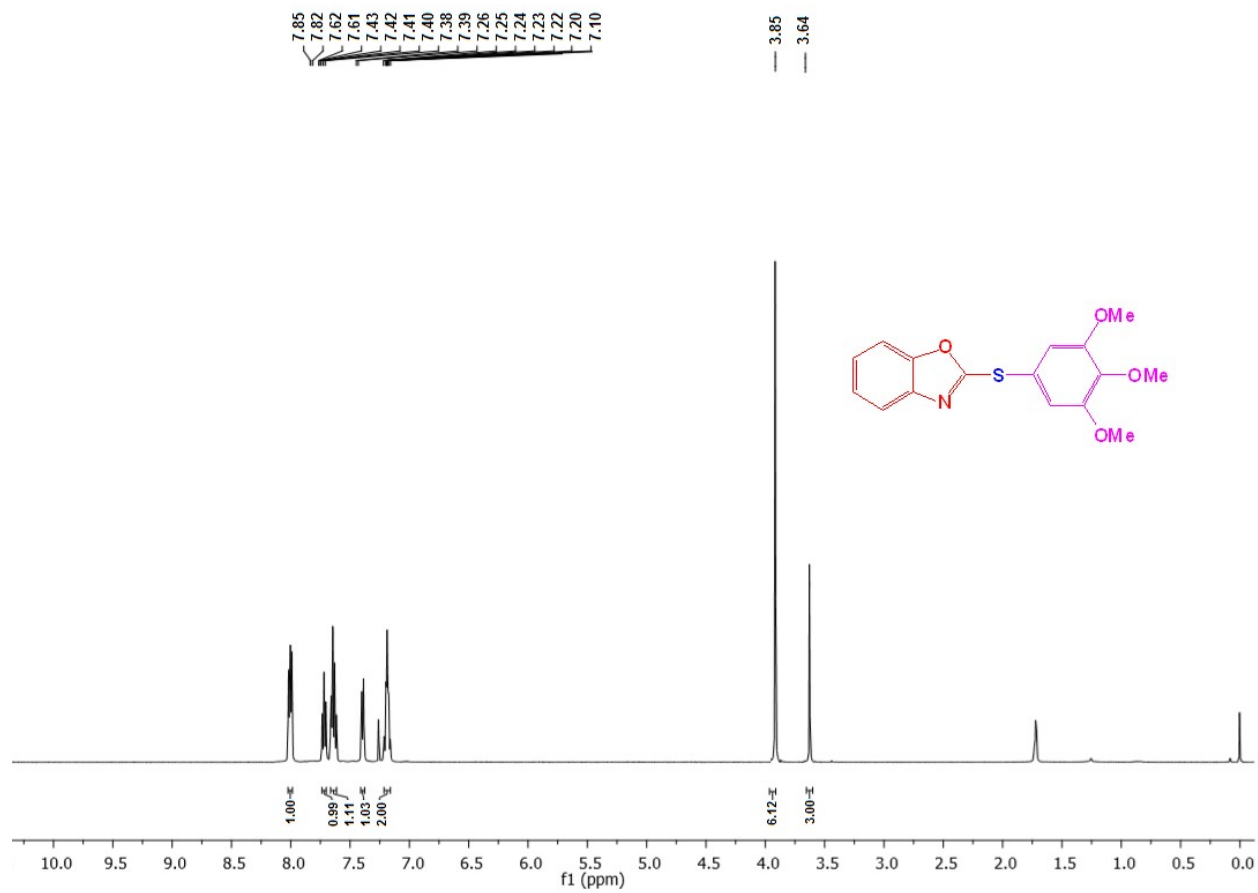

# Supplementary Information

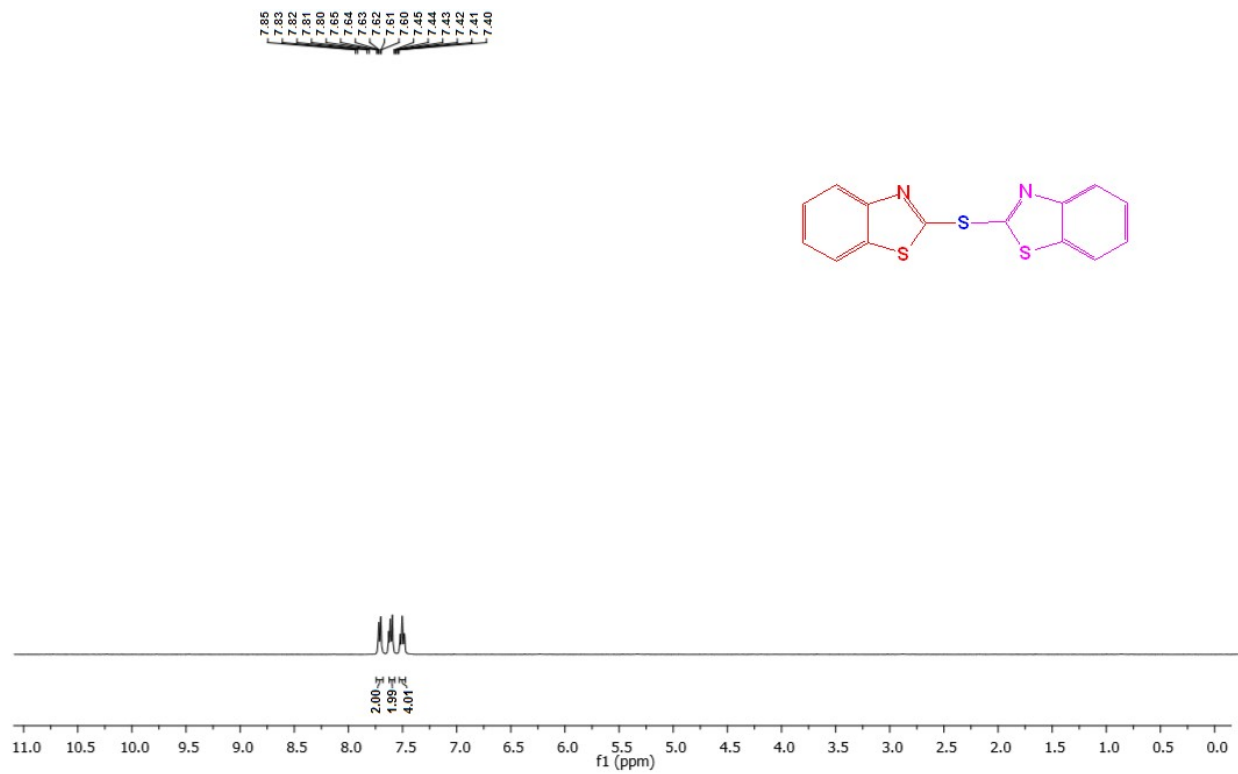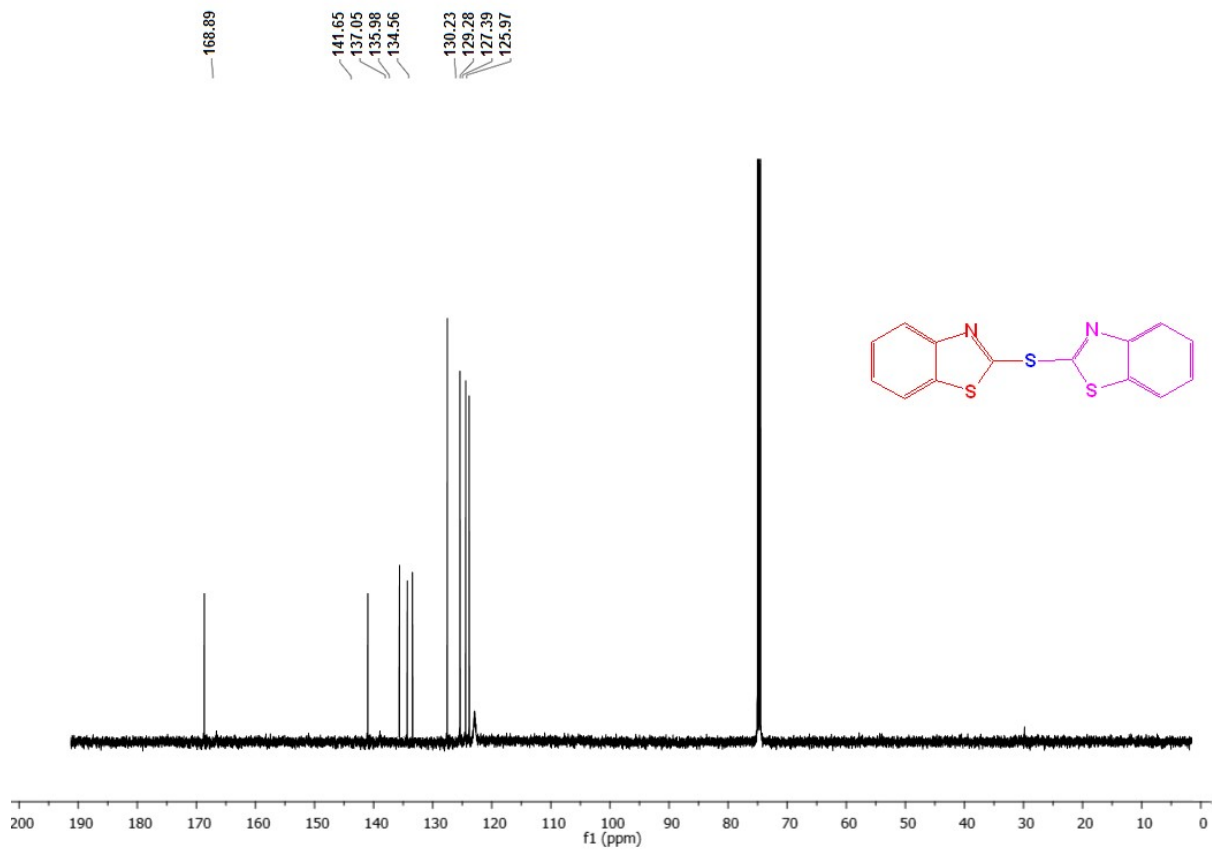

# Supplementary Information

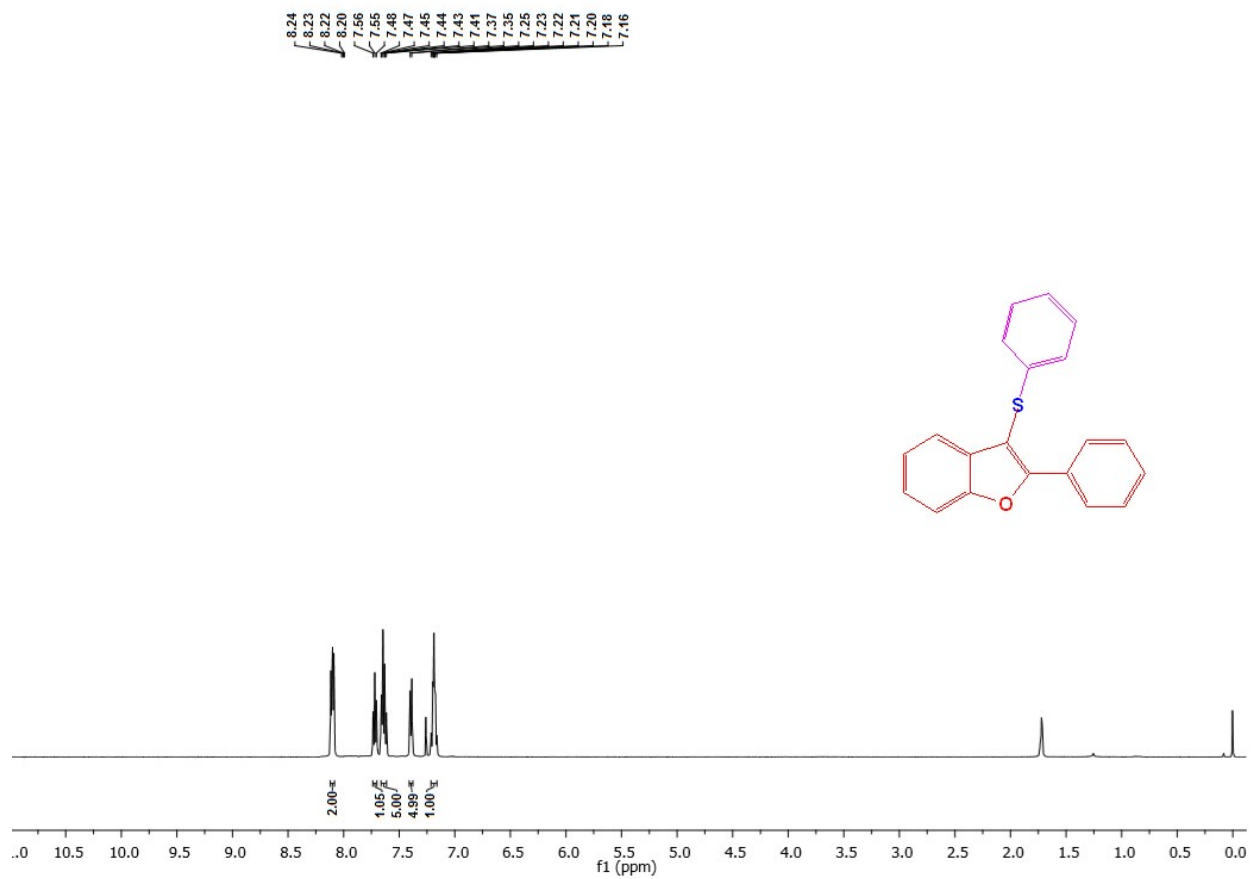



# Supplementary Information

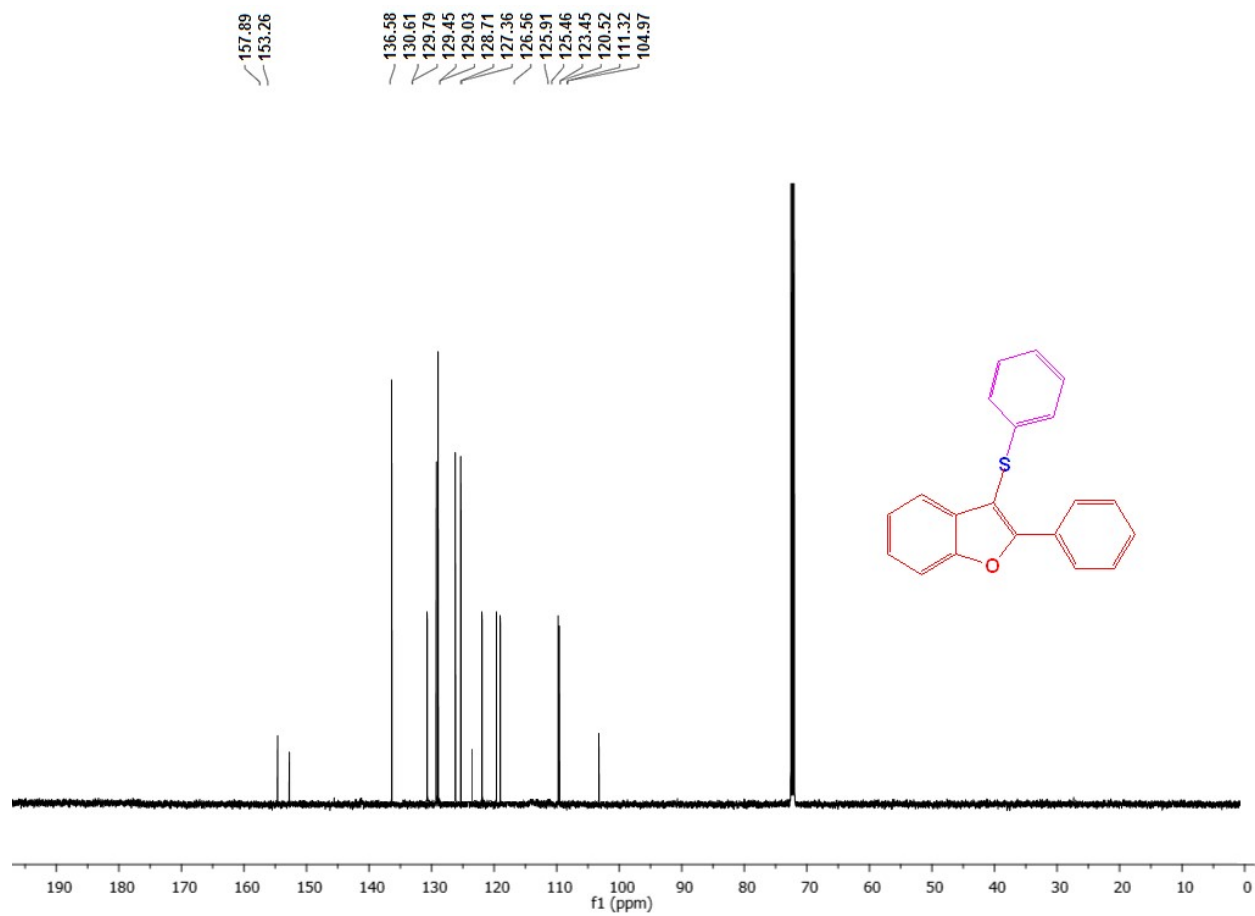

# Supplementary Information

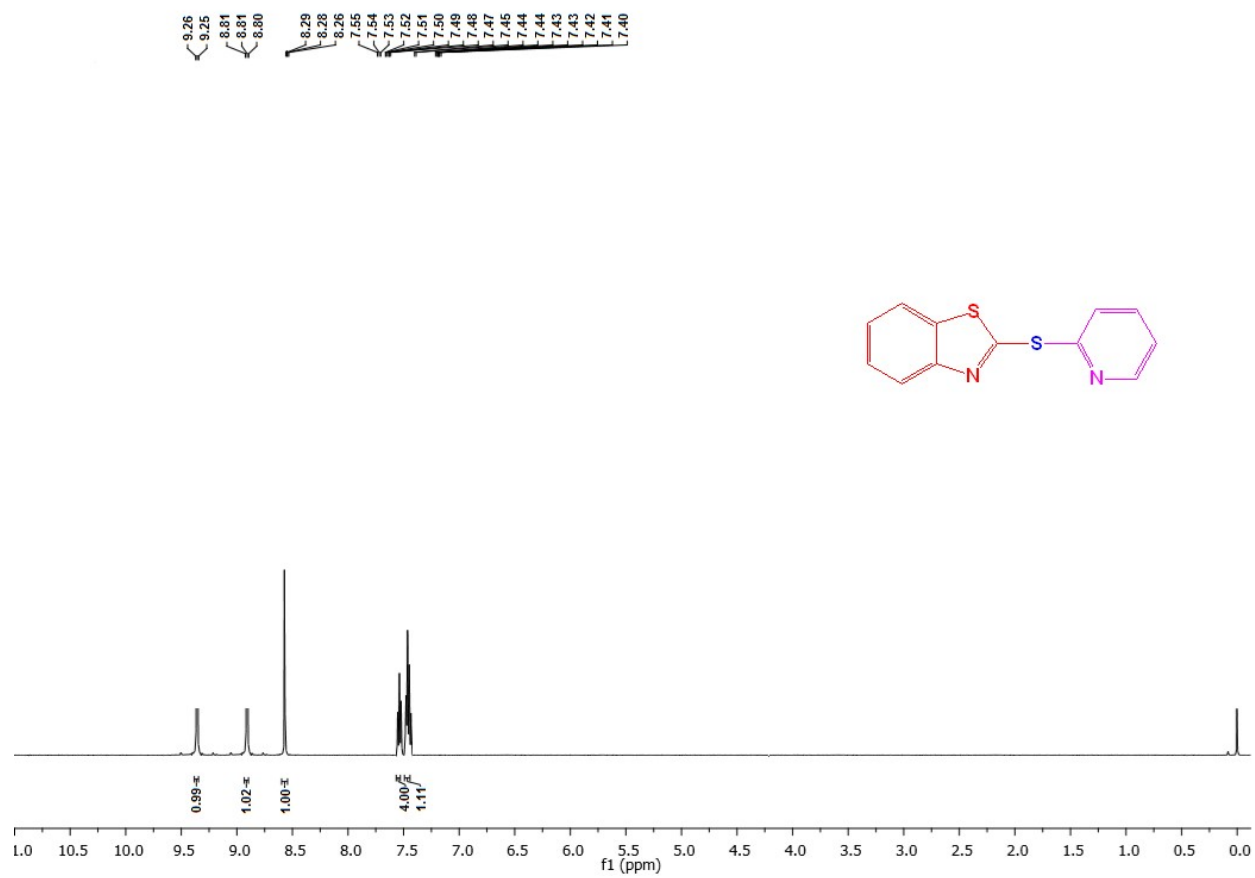

# Supplementary Information

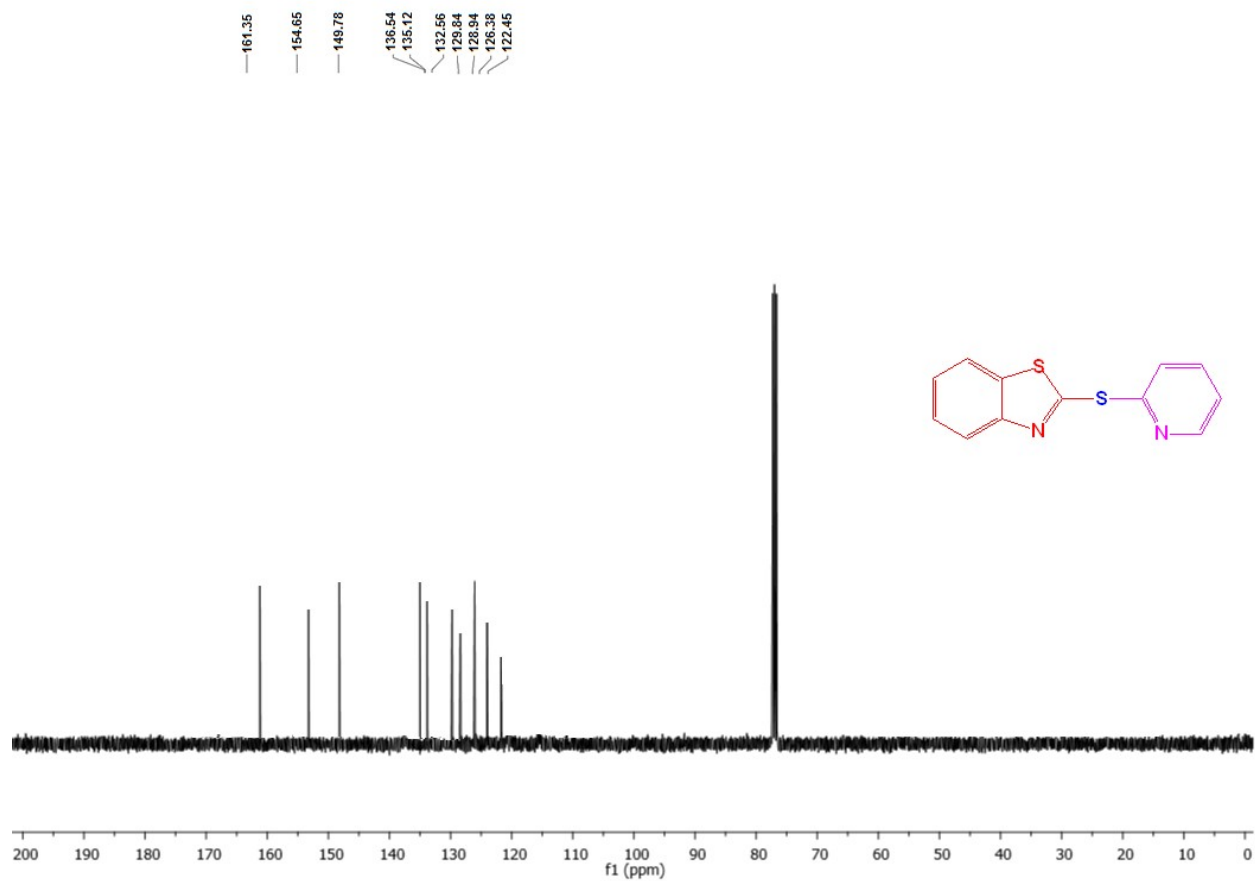

# Supplementary Information

7.91  
7.89  
7.70  
7.68  
7.66  
7.64  
7.59  
7.57  
7.49  
7.48  
7.47  
7.46  
7.45  
7.44  
7.42

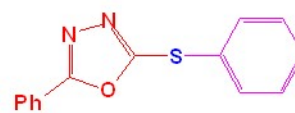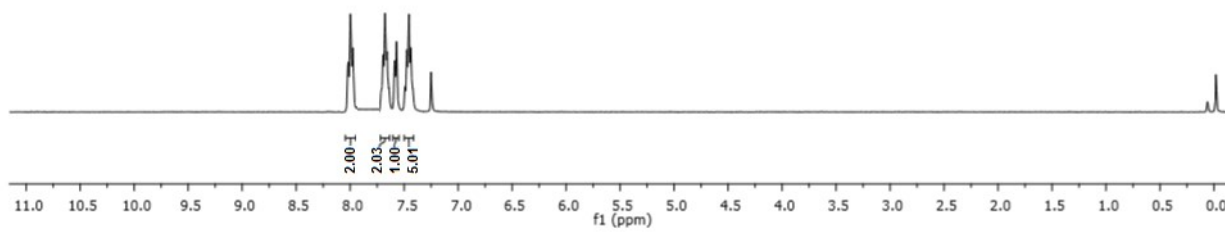

# Supplementary Information

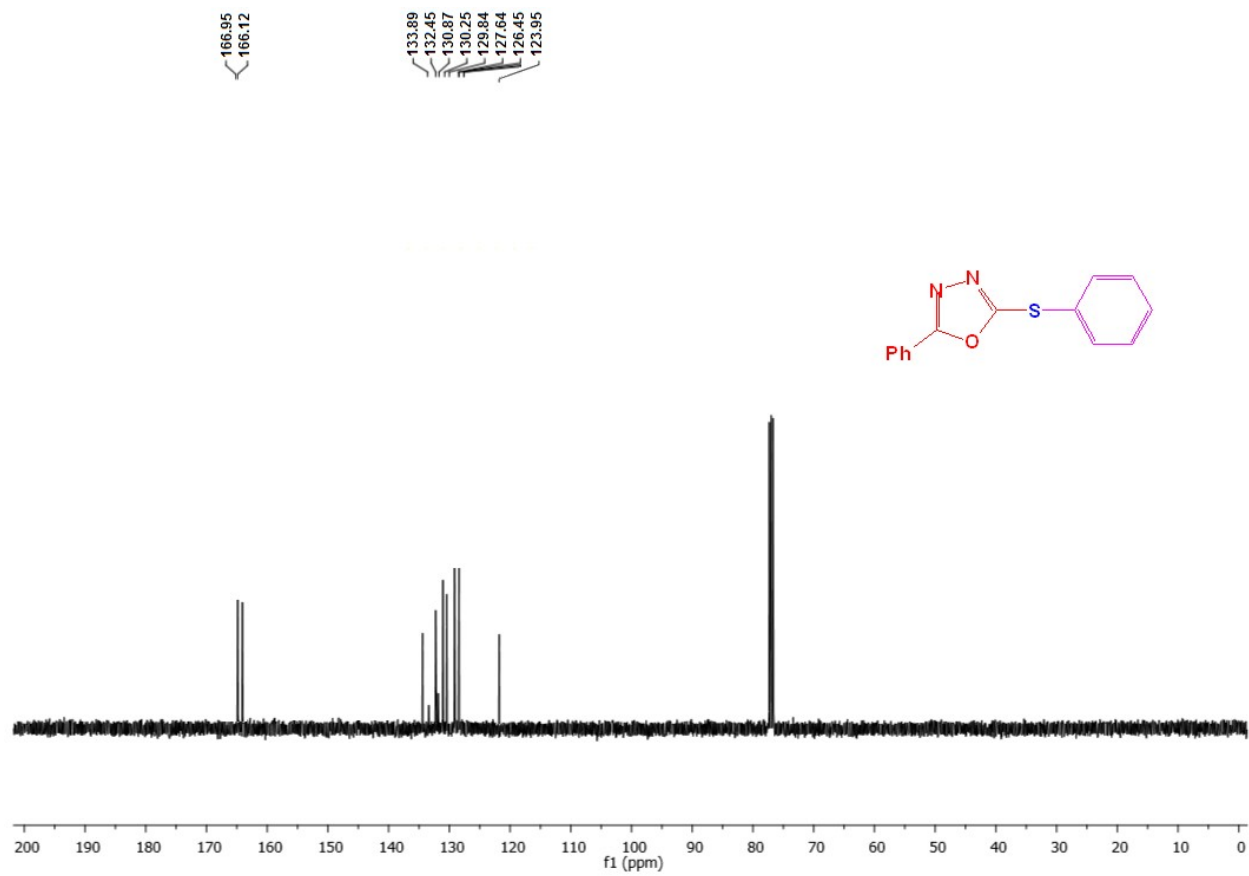

# Supplementary Information

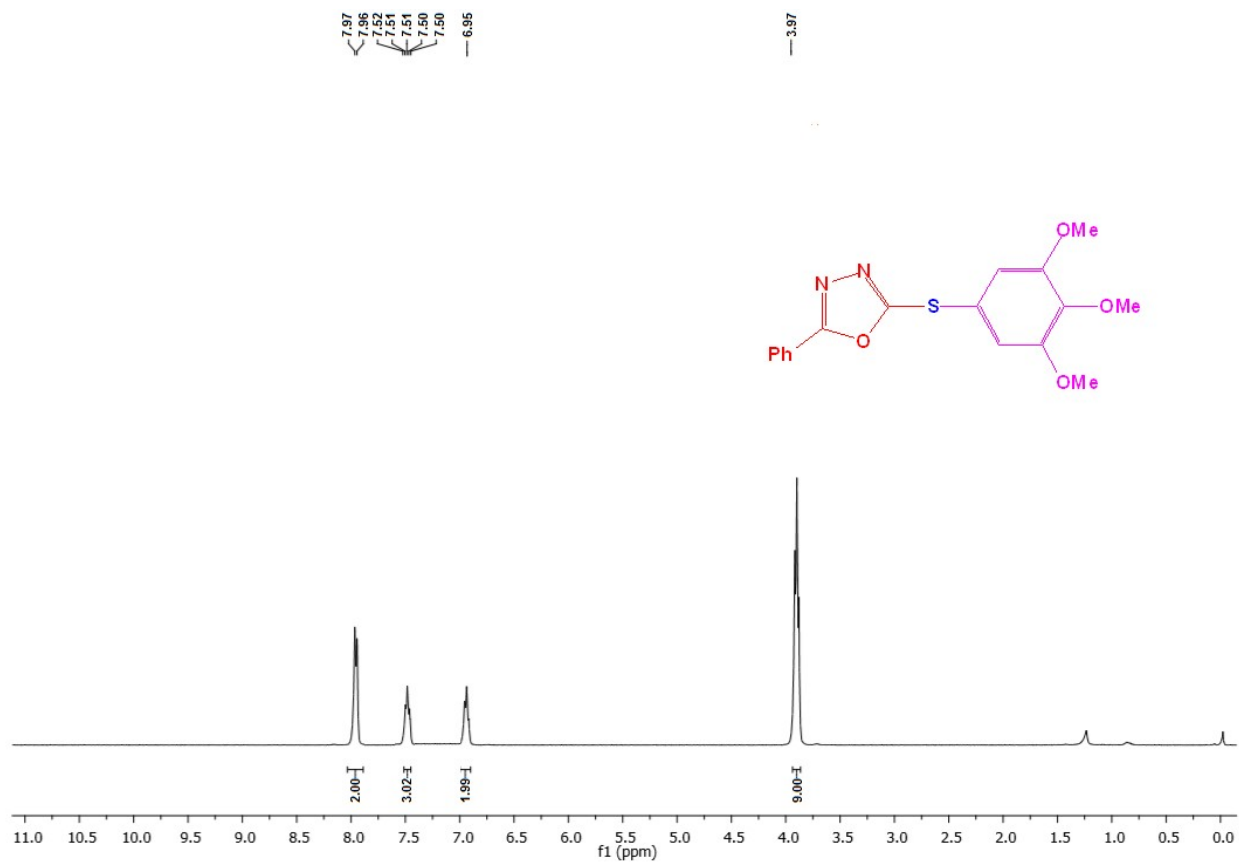

# Supplementary Information

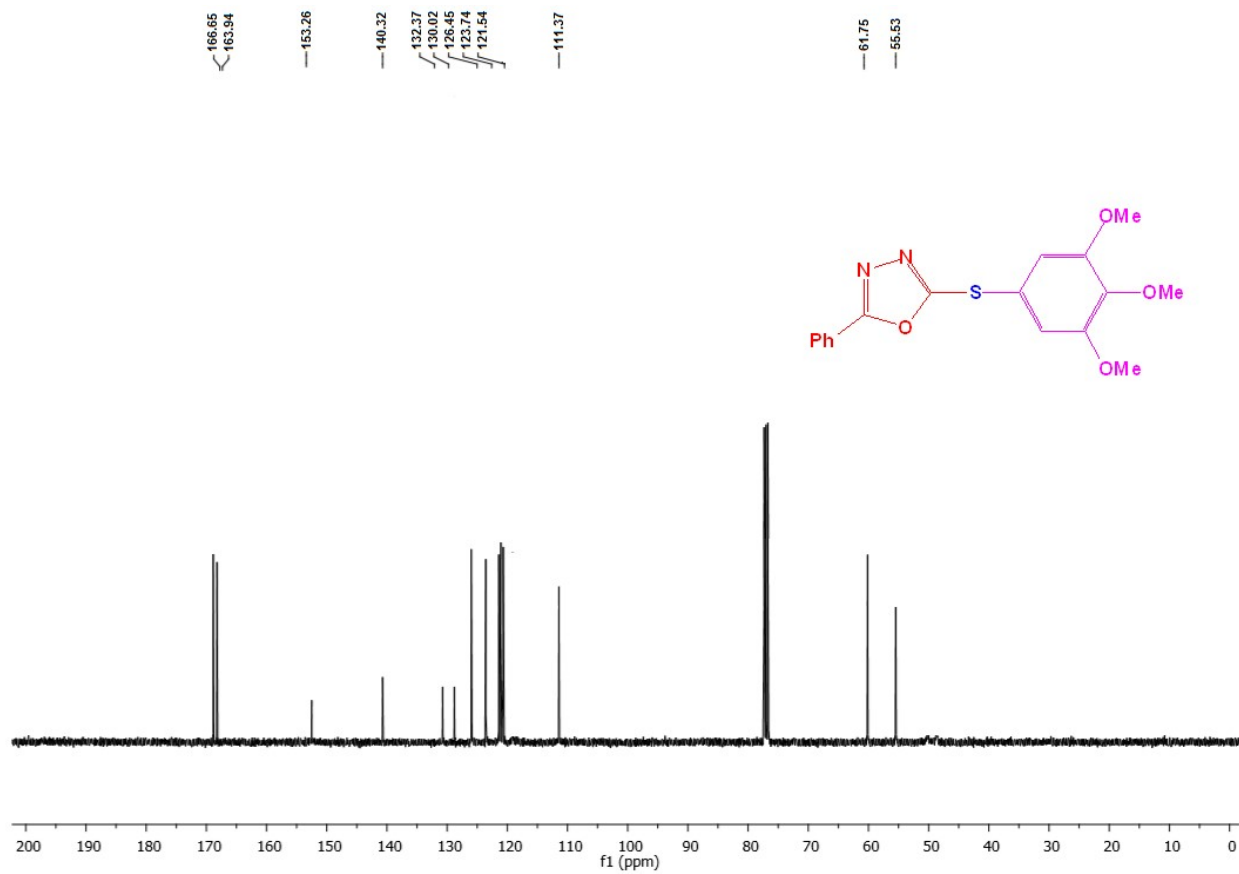

# Supplementary Information

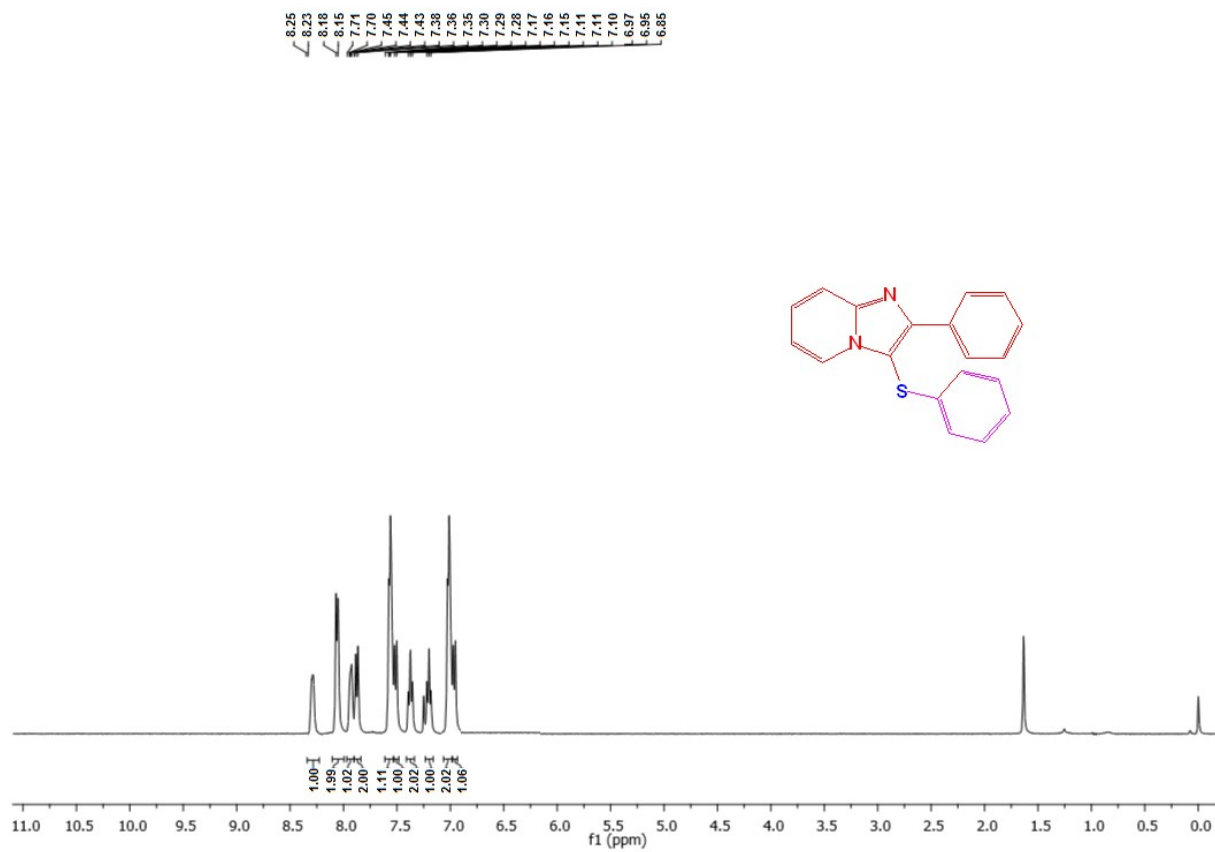



# Supplementary Information

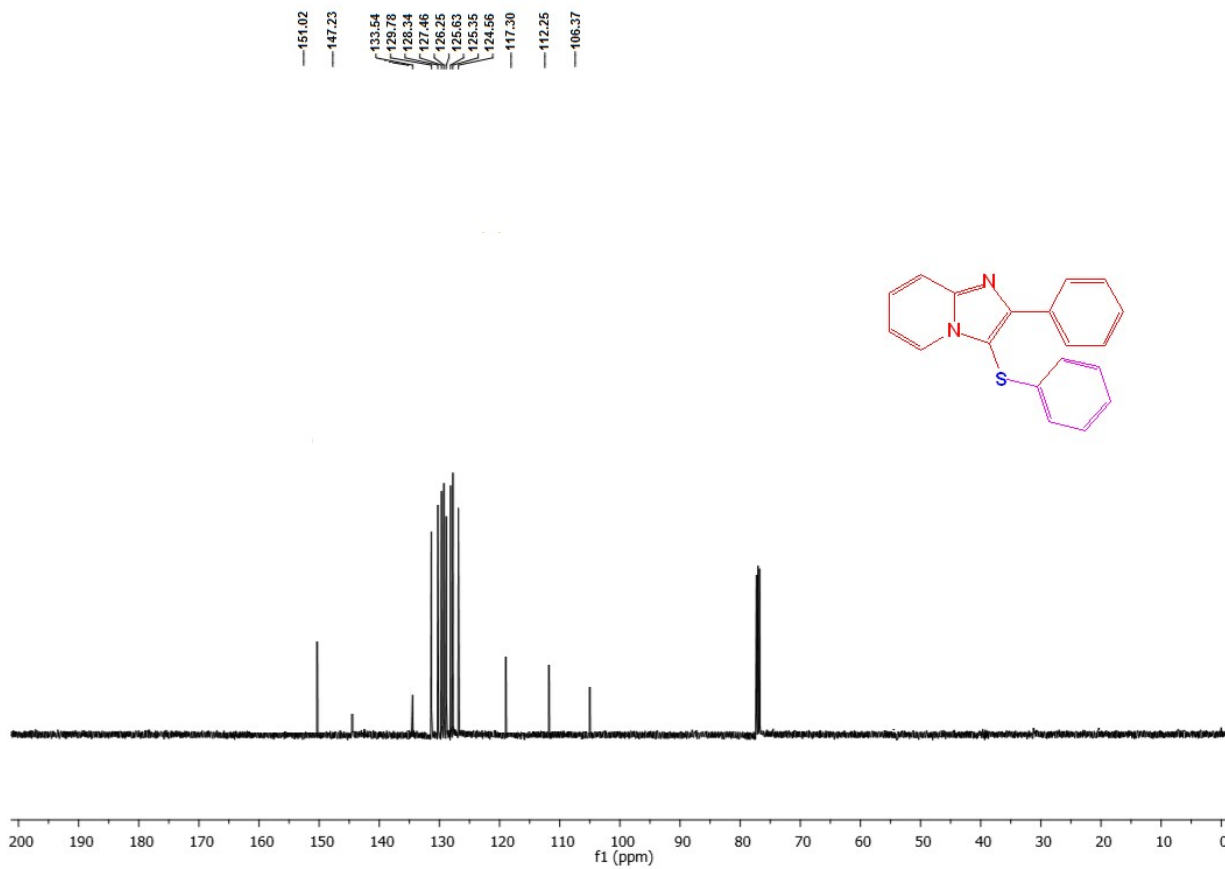

# Supplementary Information

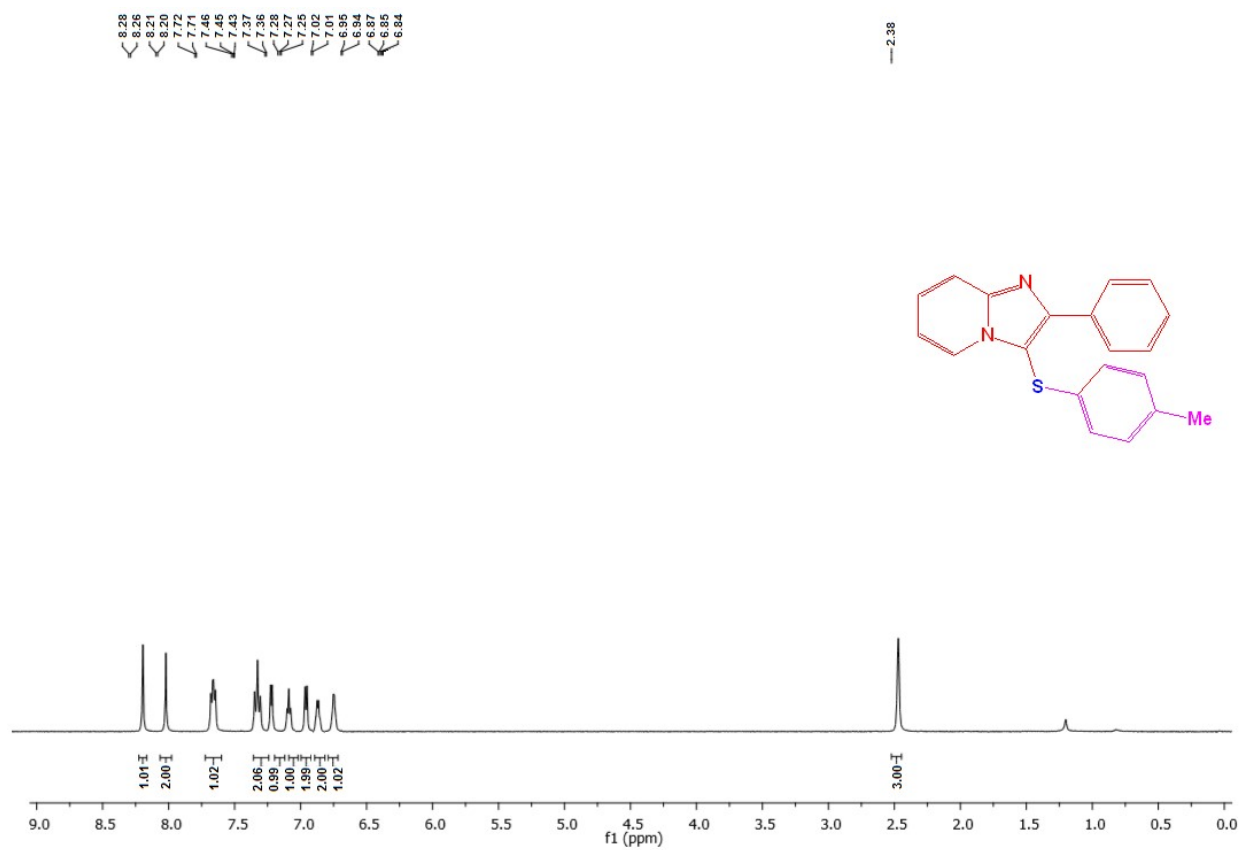

# Supplementary Information

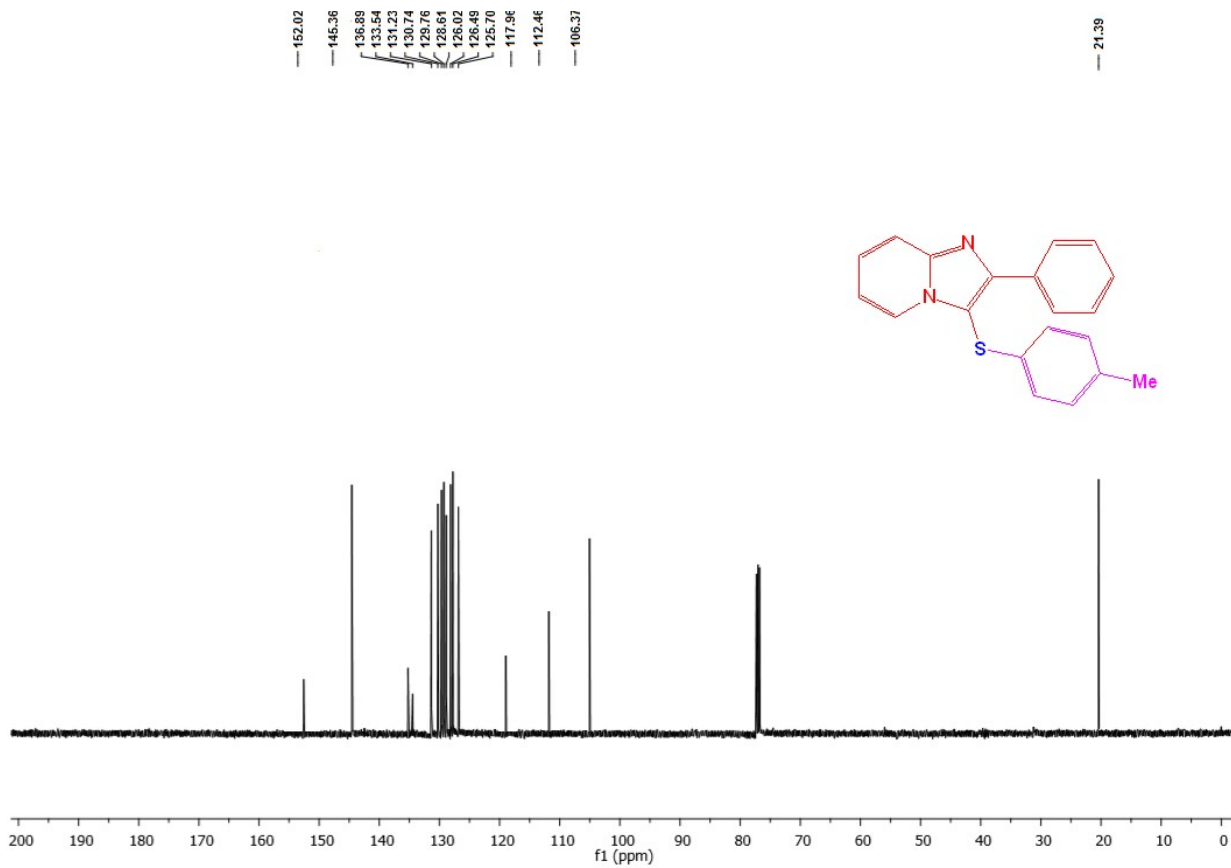

# Supplementary Information

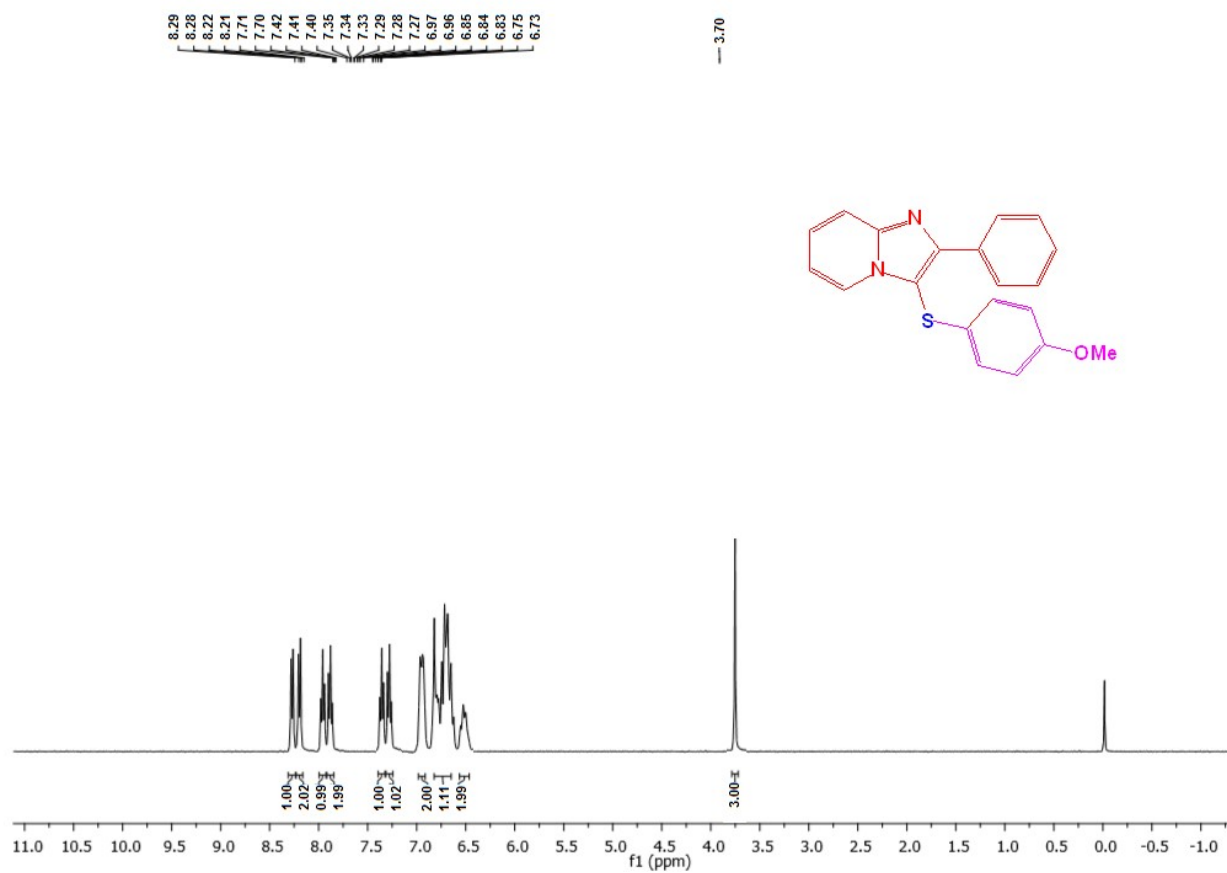

# Supplementary Information

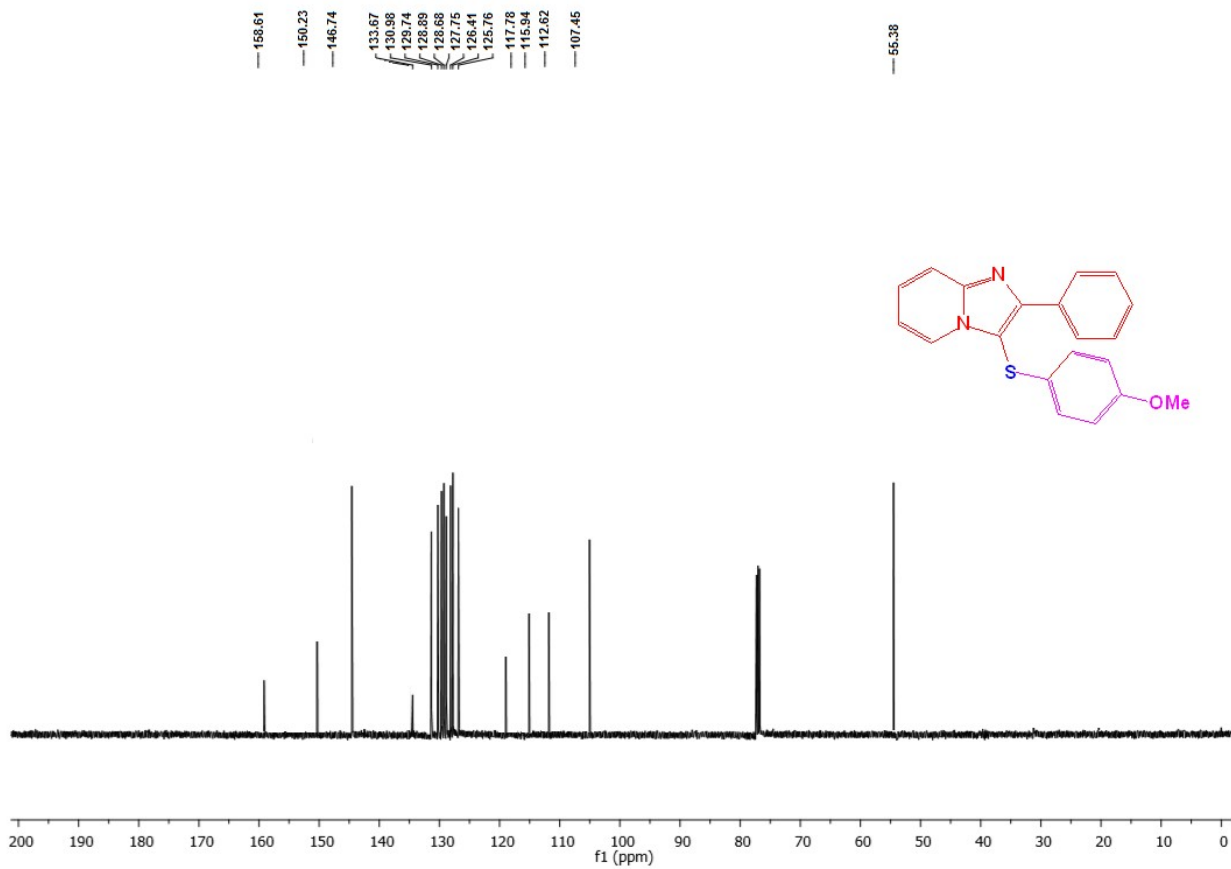

# Supplementary Information

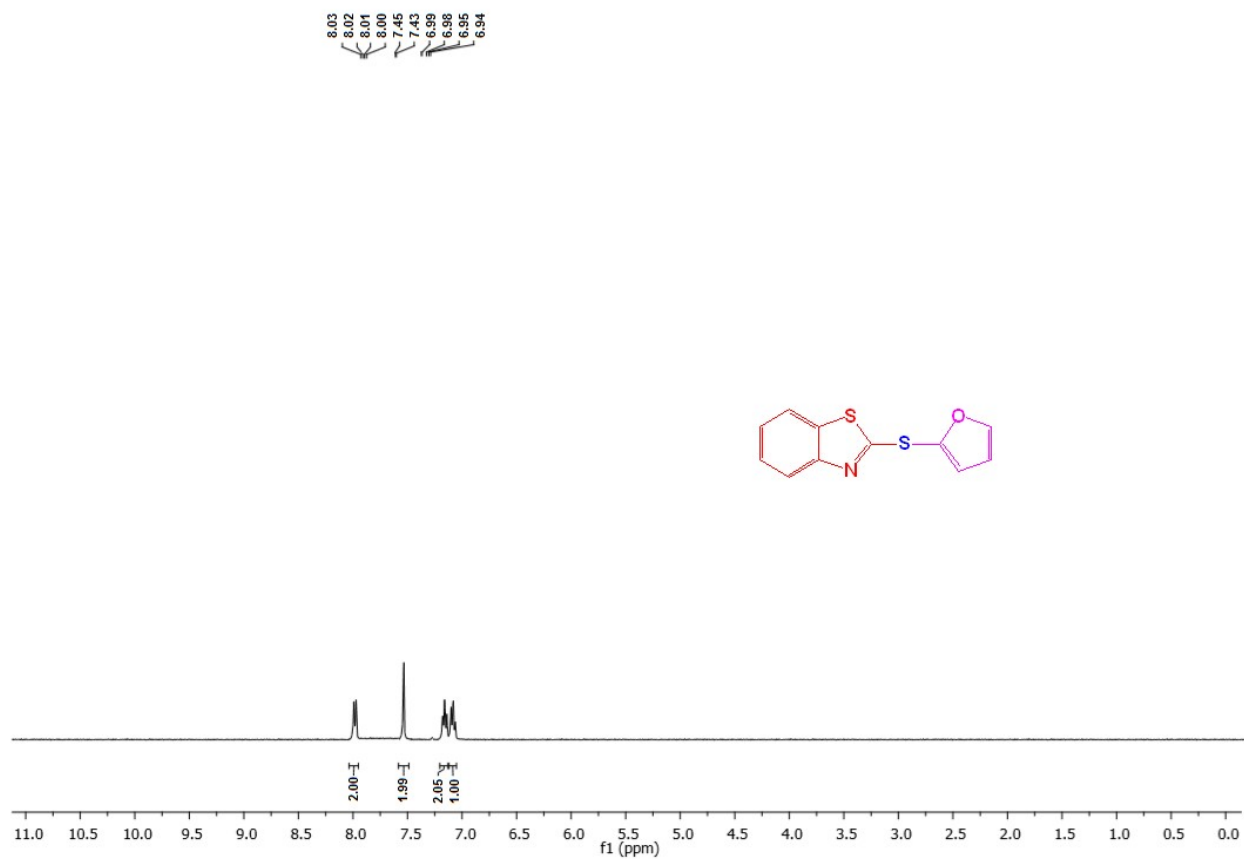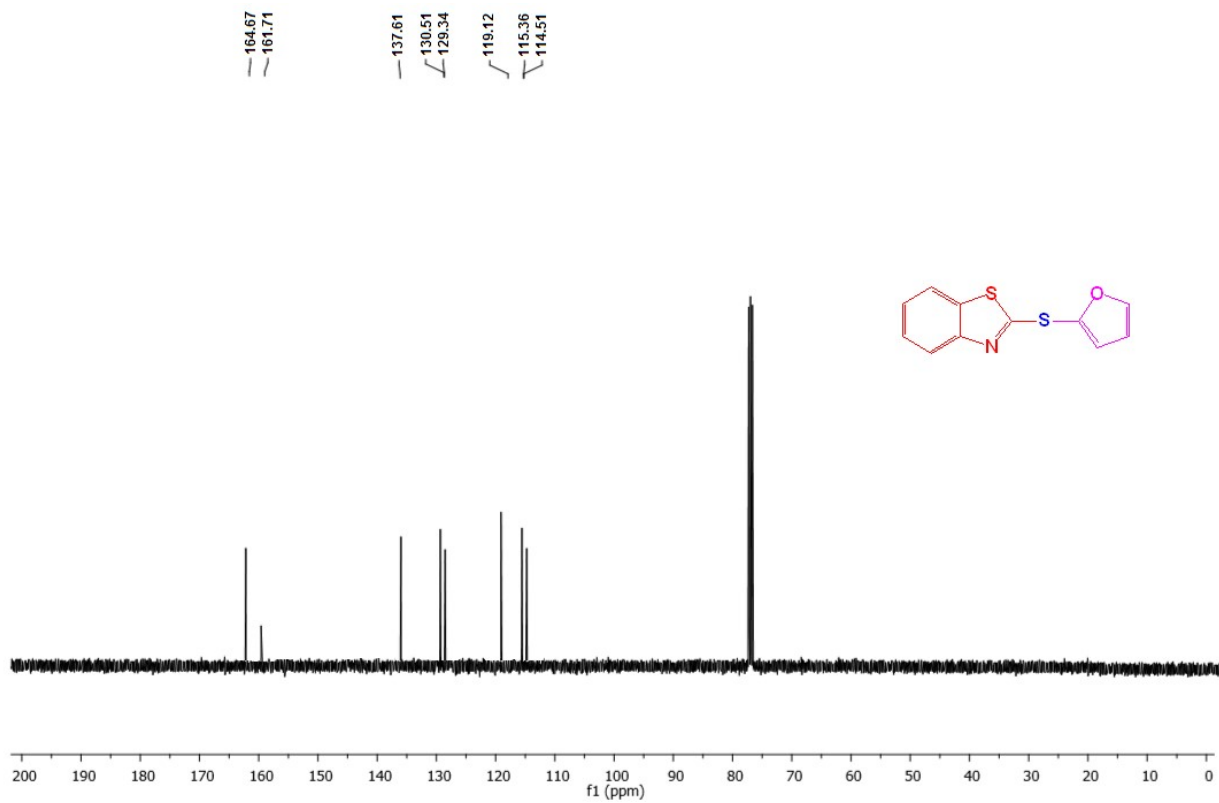

# Supplementary Information

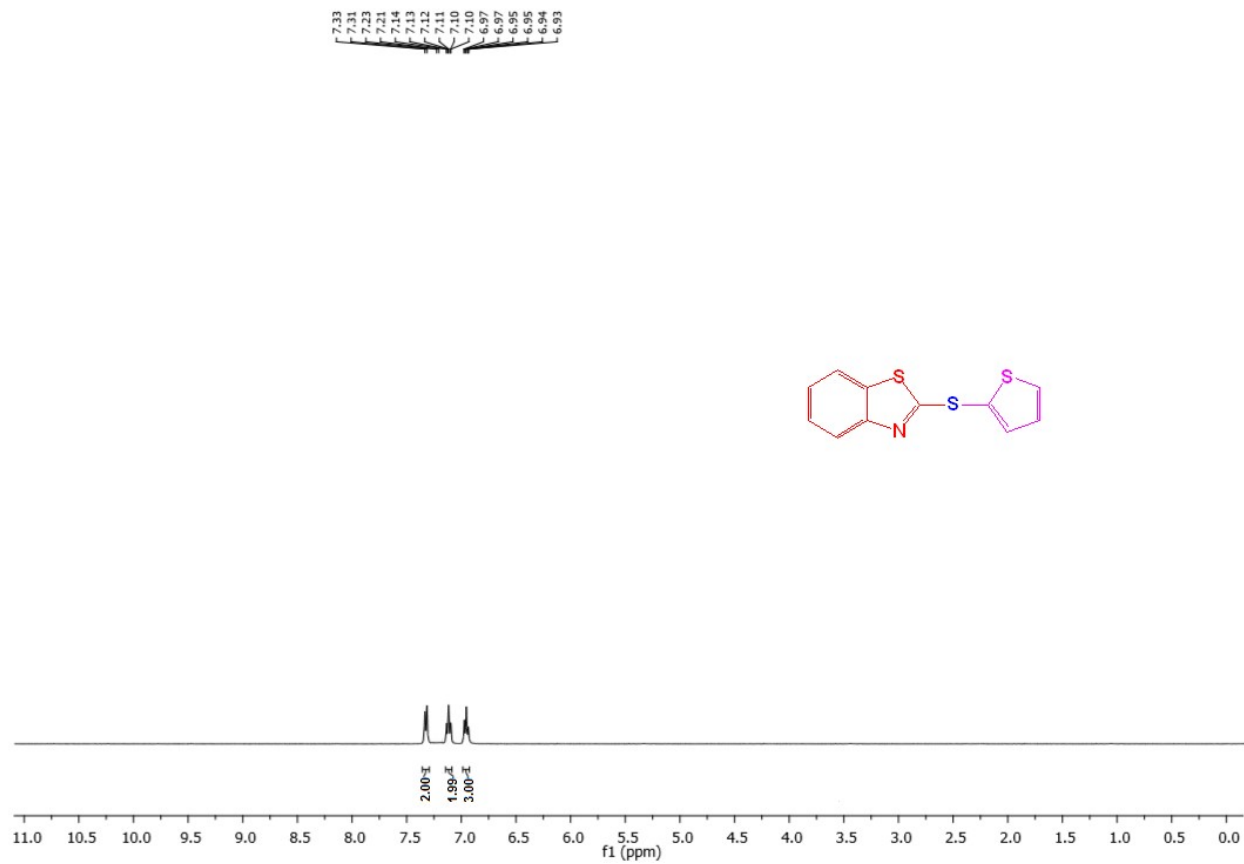

# Supplementary Information

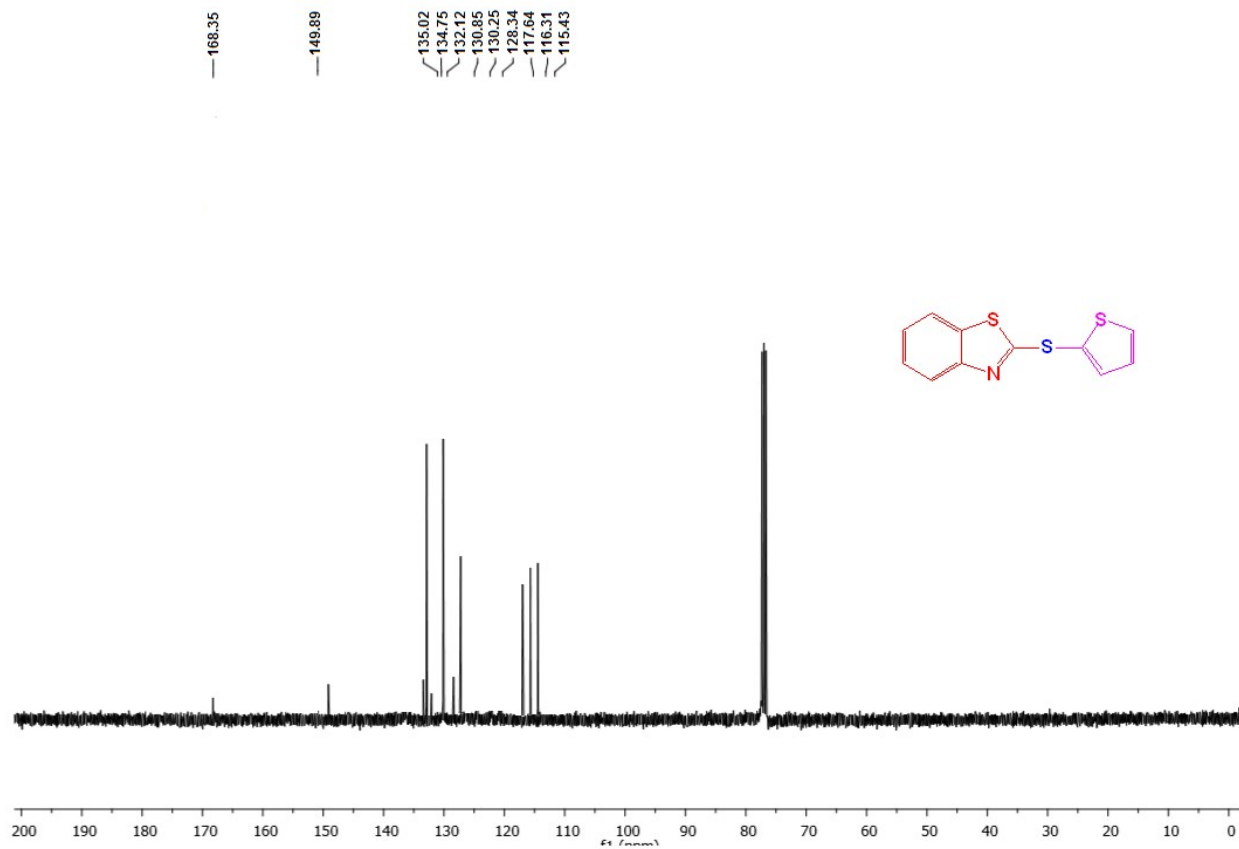



# Supplementary Information

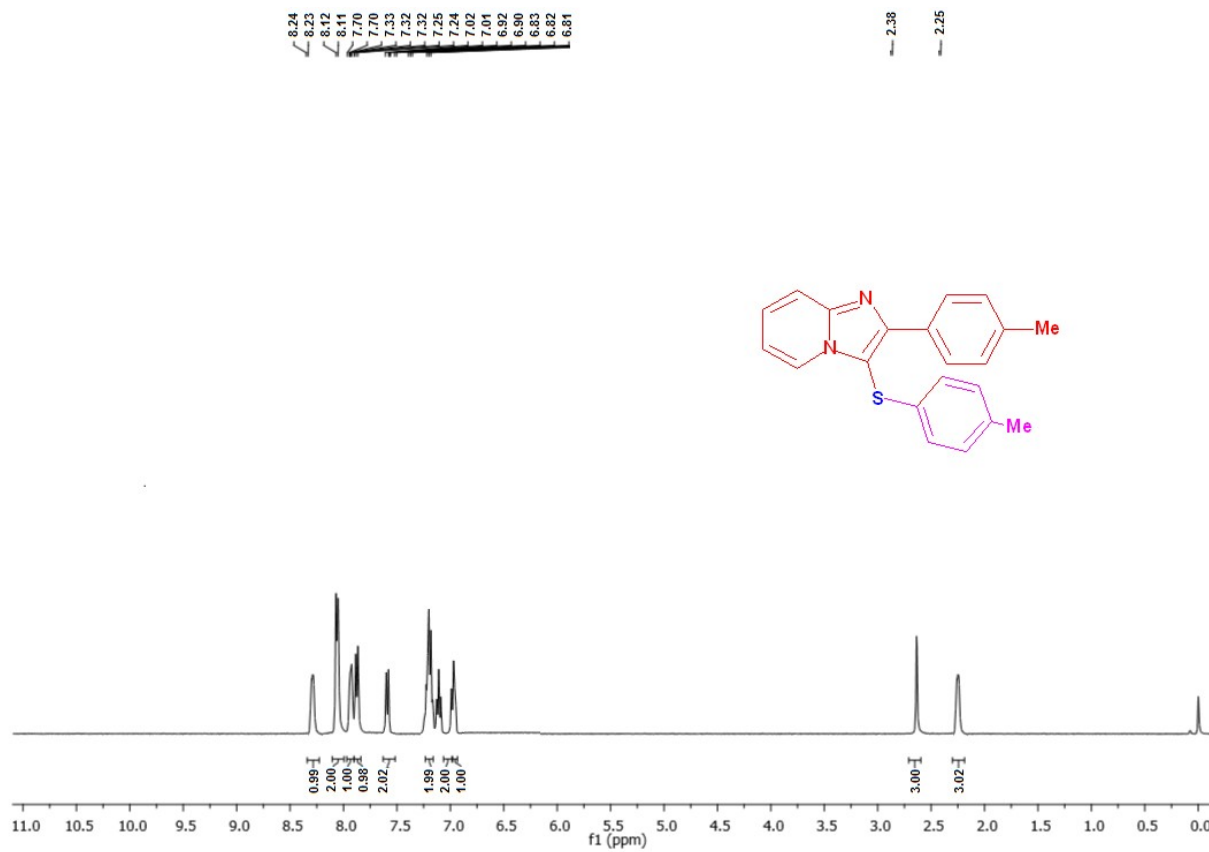

# Supplementary Information

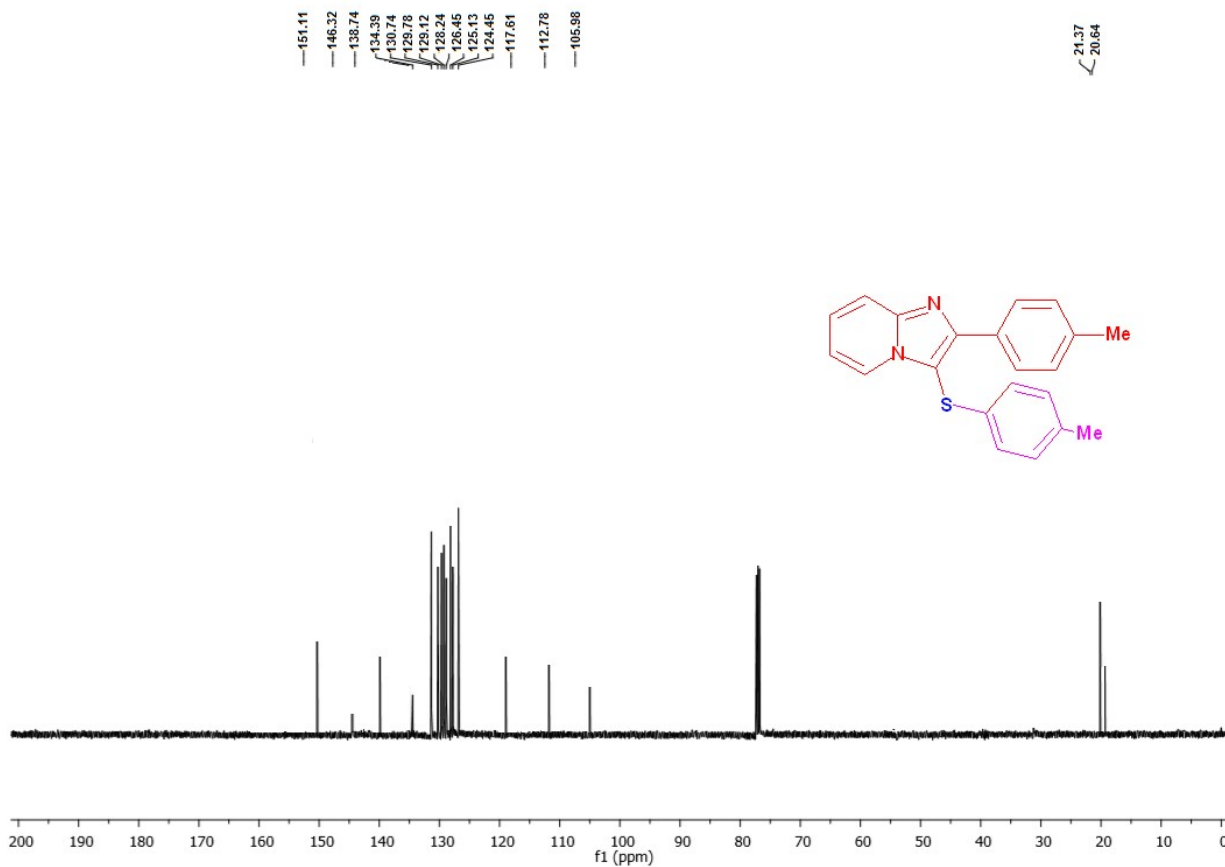

Supplement: d3ra07791h1.pdf [file d3ra07791h1.pdf]
